# Supplementary material for: Synthesis of Bisphenol Neolignans Inspired by Honokiol as Antiproliferative Agents
Source: PubMed Central journal article supplement (PMC7037512; doi:10.3390/molecules25030733), 2020-02-07
Supplement: molecules-25-00733-s001.pdf [file molecules-25-00733-s001.pdf]

# Supplementary Material

## Synthesis of bisphenol neolignans inspired by honokiol as antiproliferative agents

Nunzio Cardullo <sup>1,\*</sup>, Vincenza Barresi <sup>2</sup>, Vera Muccilli <sup>1</sup>, Giorgia Spampinato <sup>2</sup>, Morgana D'Amico <sup>2</sup> Daniele Filippo Condorelli <sup>2</sup> and Corrado Tringali <sup>1,\*</sup>

<sup>1</sup> Dipartimento di Scienze Chimiche, University of Catania, Viale A. Doria 6, 95125-Catania, Italy; [v.muccilli@unict.it](mailto:v.muccilli@unict.it) (V.M.)

<sup>2</sup> Department of Biomedical and Biotechnological Sciences, Section of Medical Biochemistry, University of Catania, Via Santa Sofia 97, 95123-Catania, Italy; [vincenza.barresi@unict.it](mailto:vincenza.barresi@unict.it) (V.B.), [giorgiaspampinato@unict.it](mailto:giorgiaspampinato@unict.it) (G.S.), [morganadamico01@gmail.com](mailto:morganadamico01@gmail.com) (M.D.), [daniele.condorelli@unict.it](mailto:daniele.condorelli@unict.it) (D.F.C.)

\* Correspondence: [ctringali@unict.it](mailto:ctringali@unict.it) (C.T.); [ncardullo@unict.it](mailto:ncardullo@unict.it) (N.C.); tel: +39-095-7385025 (C.T.).

|                                                     |    |
|-----------------------------------------------------|----|
| Preliminary experiments for bromination             | 1  |
| Preliminary experiments for Suzuki Miyaura reaction | 1  |
| HRESIMS and NMR spectra of compound <b>6</b>        | 2  |
| HRESIMS and NMR spectra of compound <b>12a</b>      | 3  |
| HRESIMS and NMR spectra of compound <b>12b</b>      | 6  |
| HRESIMS and NMR spectra of compound <b>12c</b>      | 8  |
| HRESIMS and NMR spectra of compound <b>13a</b>      | 11 |
| HRESIMS and NMR spectra of compound <b>13b</b>      | 14 |
| HRESIMS and NMR spectra of compound <b>13c</b>      | 17 |
| HRESIMS and NMR spectra of compound <b>14a</b>      | 21 |
| HRESIMS and NMR spectra of compound <b>14b</b>      | 23 |
| HRESIMS and NMR spectra of compound <b>14c</b>      | 26 |
| HRESIMS and NMR spectra of compound <b>15a</b>      | 29 |

### Preliminary experiments for bromination

2-Methoxy-4-propylphenol (**10a**) has been subjected to preliminary reactions as reported:

- 1) compound **10a** (21 mg; 126  $\mu\text{mol}$ ) was solubilized in  $\text{CH}_3\text{CN}$  (700  $\mu\text{L}$ ) and treated with  $\text{I}_2$  (7 mg; 20%) and *N*-bromosuccinimide (NBS; 31.5 mg; 175  $\mu\text{mol}$ ) at rt;
- 2) compound **10a** (21 mg; 126  $\mu\text{mol}$ ) was solubilized in  $\text{CHCl}_3$  (700  $\mu\text{L}$ ) and treated with  $\text{I}_2$  (7 mg; 20%) and NBS (31.5 mg; 175  $\mu\text{mol}$ ) at rt;
- 3) compound **10a** (21 mg; 126  $\mu\text{mol}$ ) was solubilized in  $\text{CH}_3\text{CN}$  (700  $\mu\text{L}$ ) and treated with  $\text{AlCl}_3$  (7 mg; 40%) NBS (31 mg; 170  $\mu\text{mol}$ ) at rt;
- 4) compound **10a** (21 mg; 126  $\mu\text{mol}$ ) was solubilized in  $\text{CHCl}_3$  (700  $\mu\text{L}$ ) and treated with  $\text{AlCl}_3$  (7 mg; 40%) and NBS (31.5 mg; 175  $\mu\text{mol}$ ) at rt;
- 5) the phenol **10a** (21 mg; 126  $\mu\text{mol}$ ) solubilized in  $\text{CH}_3\text{CN}$  (700  $\mu\text{L}$ ) was mixed with  $\text{AlCl}_3$  (7 mg; 40%) and  $\text{Br}_2$  (10  $\mu\text{L}$ ; 210  $\mu\text{mol}$ ) at rt;
- 6) the phenol **10a** (21 mg; 126  $\mu\text{mol}$ ) was solubilized in  $\text{CHCl}_3$  (700  $\mu\text{L}$ ) and treated with  $\text{Br}_2$  (10  $\mu\text{L}$ ; 210  $\mu\text{mol}$ ) at rt;
- 7) the phenol **10a** (21 mg; 126  $\mu\text{mol}$ ) was solubilized in  $\text{CHCl}_3$  (700  $\mu\text{L}$ ) and treated with  $\text{Br}_2$  (10  $\mu\text{L}$ ; 210  $\mu\text{mol}$ ) at 0  $^\circ\text{C}$ ;
- 8) the phenol **10a** (21 mg; 126  $\mu\text{mol}$ ) was solubilized in acetone (500  $\mu\text{L}$ ) and treated with NaBr (26.1 mg; 252  $\mu\text{mol}$ ) and a solution of oxone (100.2 mg) in water (500  $\mu\text{L}$ ) at -10  $^\circ\text{C}$ .

The mixtures were stirred at room temperature and monitored by TLC (85:15 *n*-hexane/acetone) for 6 h. Then each mixture was diluted with  $\text{CH}_2\text{Cl}_2$  (1 mL) and partitioned with a saturated  $\text{Na}_2\text{S}_2\text{O}_3$  solution. The organic layer of experiment 7 was purified on silica gel column chromatography (cyclohexane:EtOAc 98:2  $\rightarrow$  cyclohexane:EtOAc 96:4) to give **11a**. The pure product was used to create a calibration curve via HPLC-UV, to determine the yield of other reactions (see Table 1).

### Preliminary experiments for Suzuki-Miyaura cross-coupling

Preliminary experiments for S-M reaction were performed employing compound **11a** as starting material (8.3 mg, 50  $\mu\text{mol}$ ) in presence of 4-hydroxyphenylboronic acid (10.3 mg, 75  $\mu\text{mol}$ ), dppf (8.3 mg, 15  $\mu\text{mol}$ ),  $\text{Pd}(\text{OAc})_2$  (1.1 mg, 5  $\mu\text{mol}$ ) as catalyst and  $\text{K}_2\text{CO}_3$  (34.6 mg, 250  $\mu\text{mol}$ ). The solvent and temperature were varied as reported:

- 1) the reaction was carried out in THF (500  $\mu\text{L}$ ) at 25  $^\circ\text{C}$ ;
- 2) the reaction was carried out in THF (500  $\mu\text{L}$ ) at 70  $^\circ\text{C}$ ;
- 3) the mixture was stirred in THF:H<sub>2</sub>O 10:1 (500  $\mu\text{L}$  and 50  $\mu\text{L}$ ) at 70  $^\circ\text{C}$ ;
- 4) the mixture was stirred in THF:H<sub>2</sub>O 10:1 (910  $\mu\text{L}$  and 90  $\mu\text{L}$ ) at 70  $^\circ\text{C}$ ;
- 5) the reaction was carried out in 1,4-dioxane (500  $\mu\text{L}$ ) at 70  $^\circ\text{C}$ ;
- 6) the reaction was carried out in 1,4-dioxane (500  $\mu\text{L}$ ) at 180  $^\circ\text{C}$ .

The course of the reactions was followed by TLC for 24h, then they were partitioned between H<sub>2</sub>O:EtOAc (3 x 1 mL). The organic layer obtained from experiment 4) was purified on silica gel column chromatography (petroleum ether  $\rightarrow$  petroleum ether:acetone 92:8) to furnish the product **12a**. The pure bisphenol was used to create a calibration curve via HPLC-UV, to determine the yield of other reactions (see Table 2).

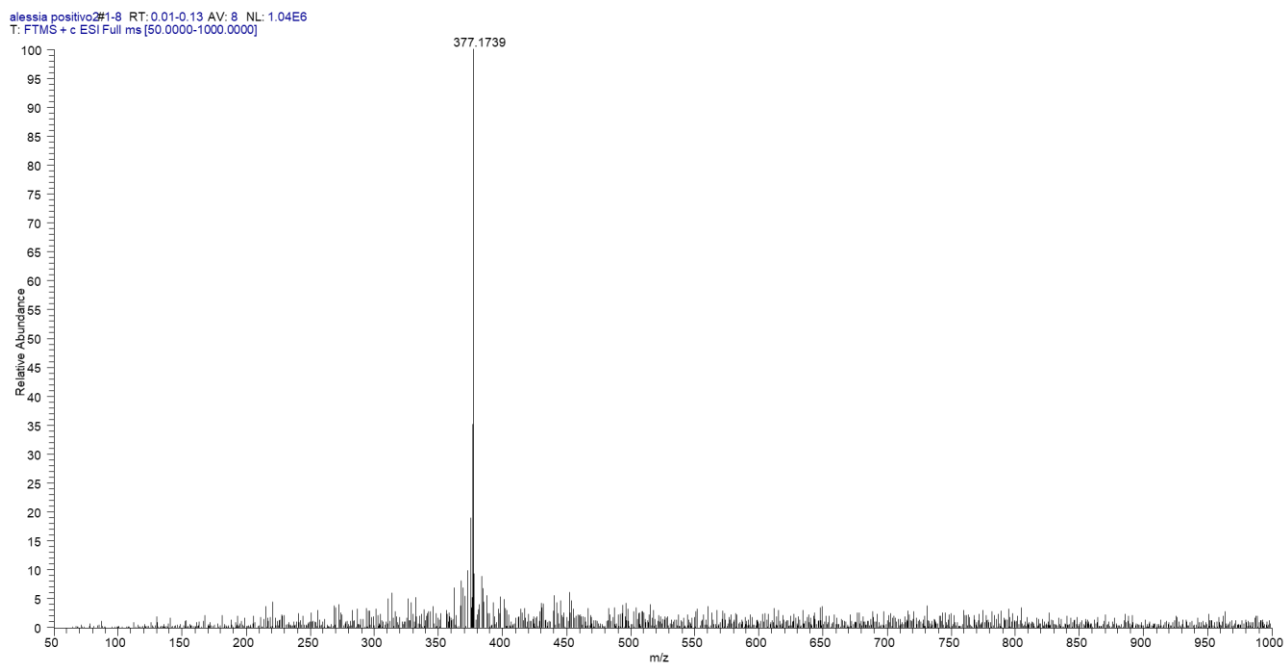

**Figure S1.** HRESIMS (+) spectrum of **6**.

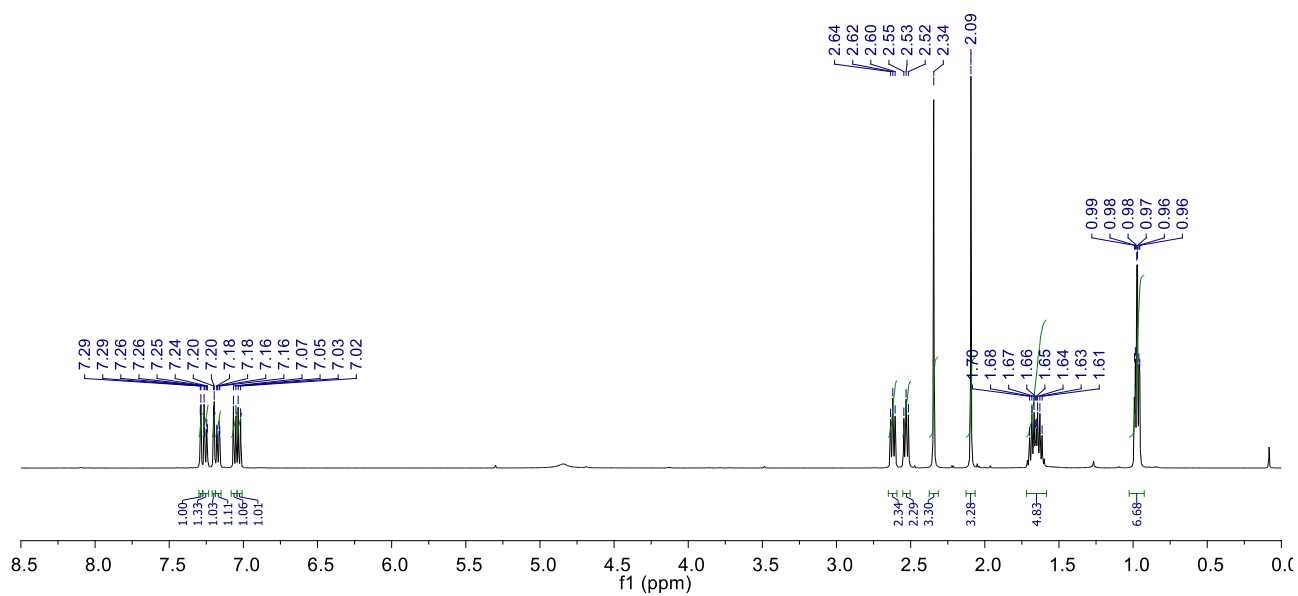

**Figure S2.**  $^1\text{H}$  NMR spectrum (500 MHz,  $\text{CDCl}_3$ ) of **6**.

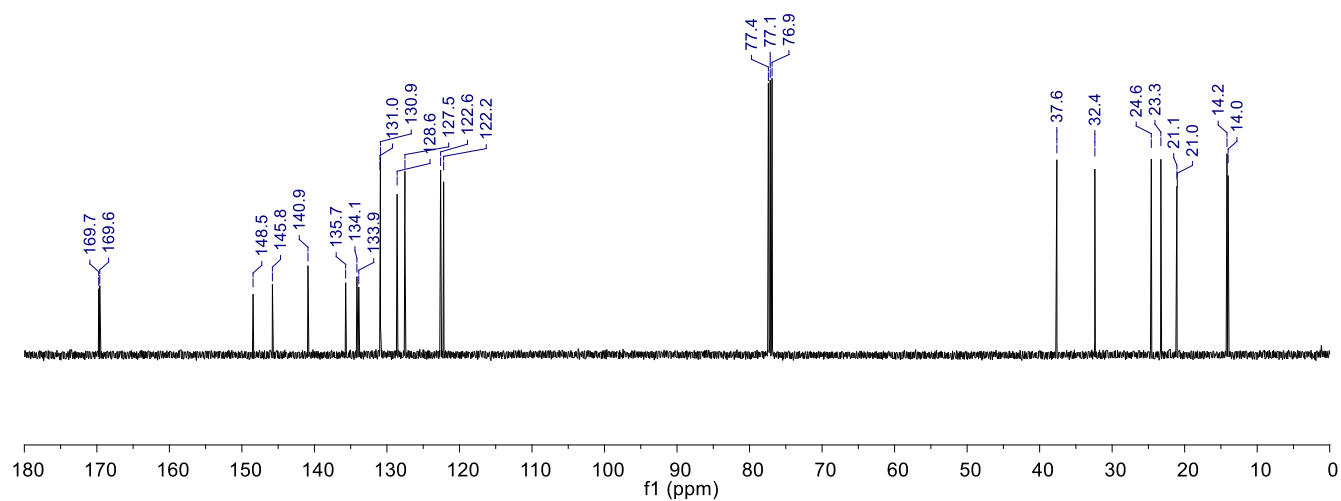

**Figure S3.**  $^{13}\text{C}$  NMR spectrum (125 MHz,  $\text{CDCl}_3$ ) of **6**.

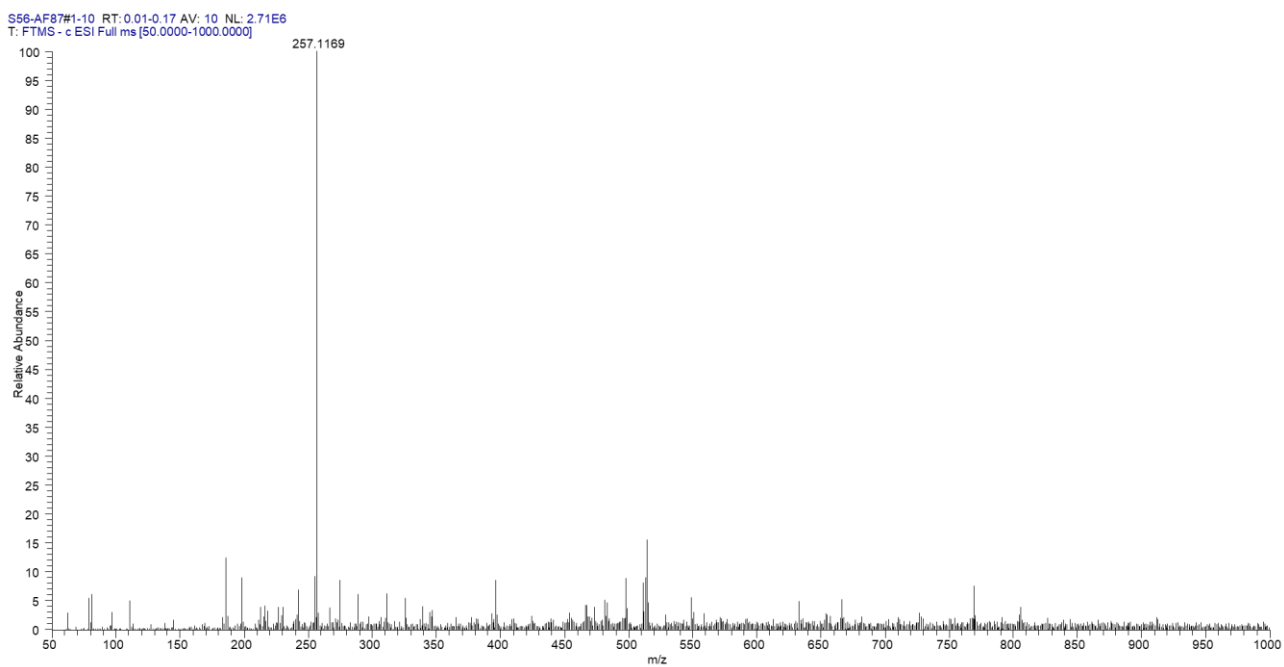

**Figure S4.** HRESIMS (-) spectrum of **12a**.

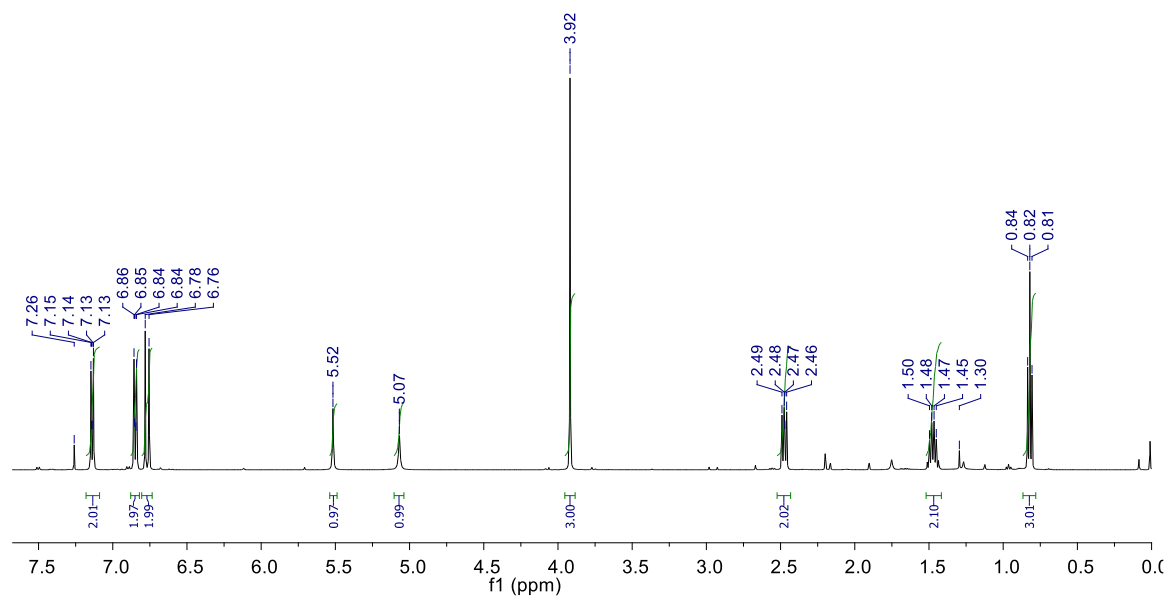

Figure S5.  $^1\text{H}$  NMR spectrum (500 MHz,  $\text{CDCl}_3$ ) of **12a**.

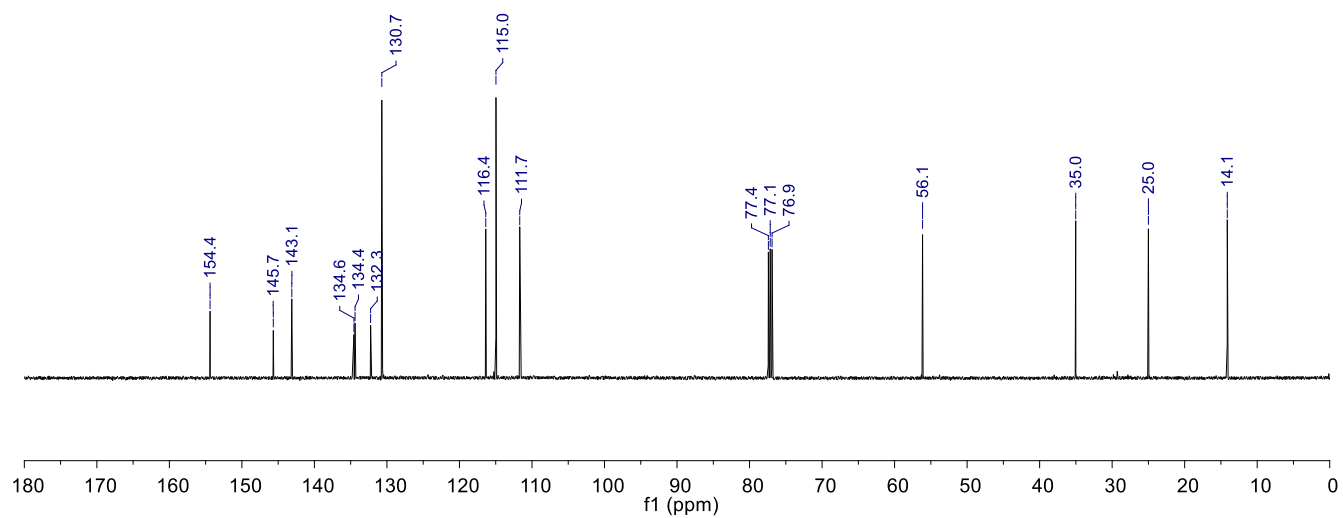

Figure S6.  $^{13}\text{C}$  NMR spectrum (125 MHz,  $\text{CDCl}_3$ ) of **12a**.

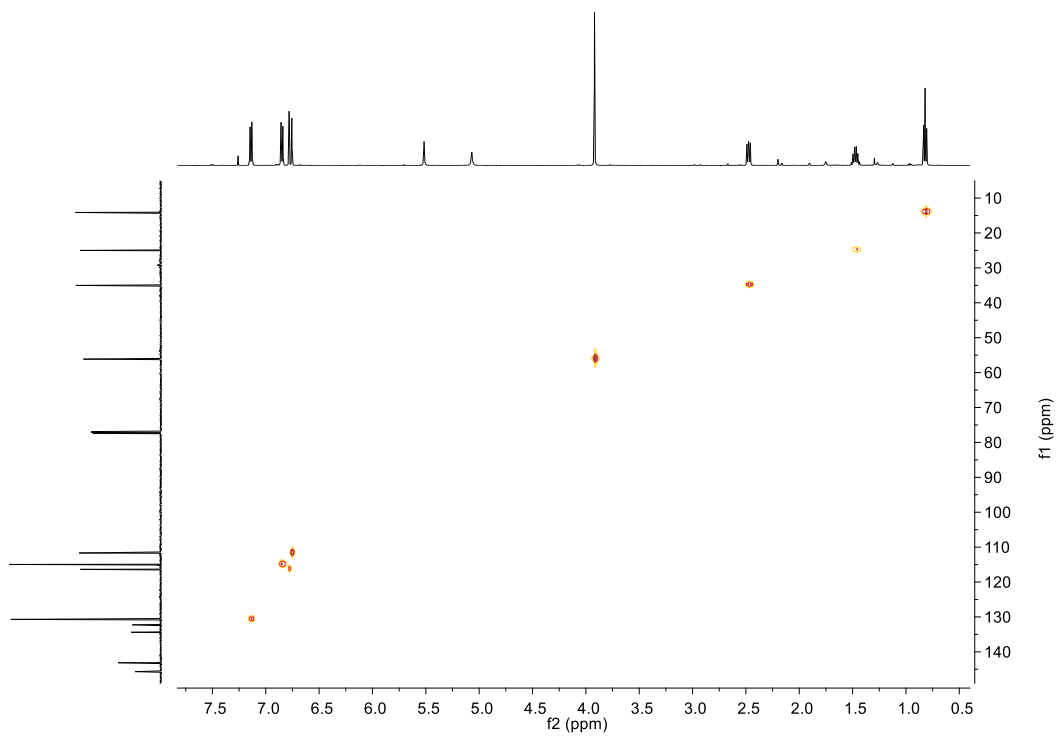

Figure S7. gHSQC spectrum of **12a**.

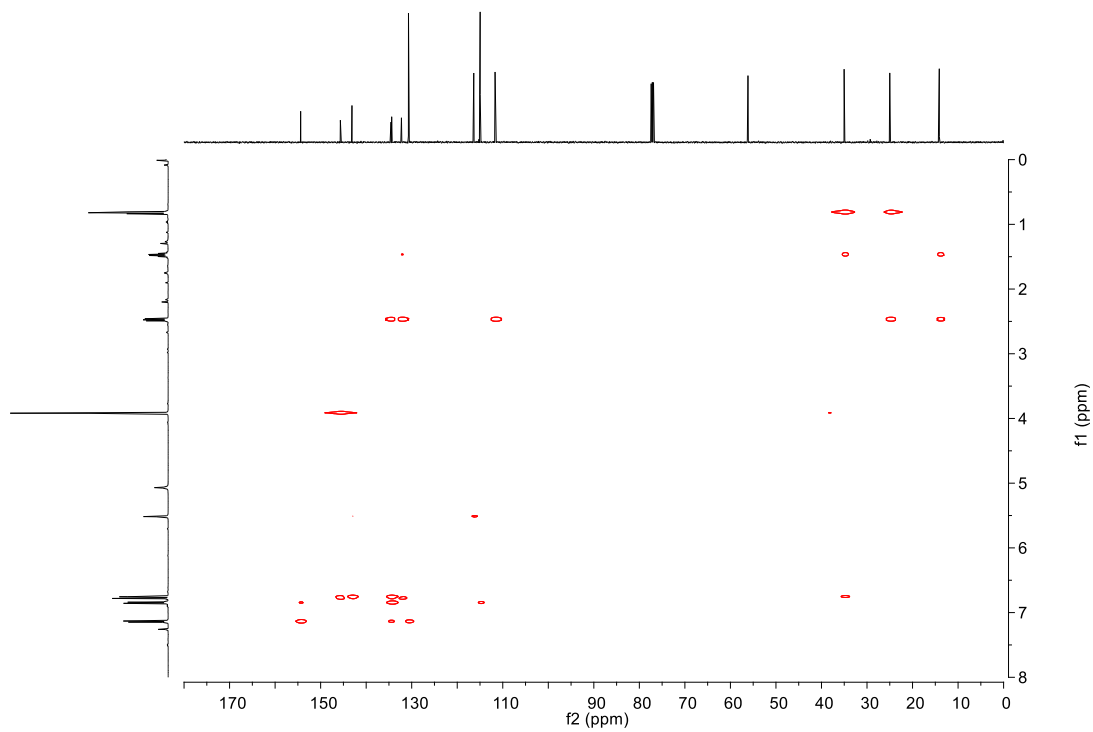

Figure S8. gHMBC spectrum of **12a**.

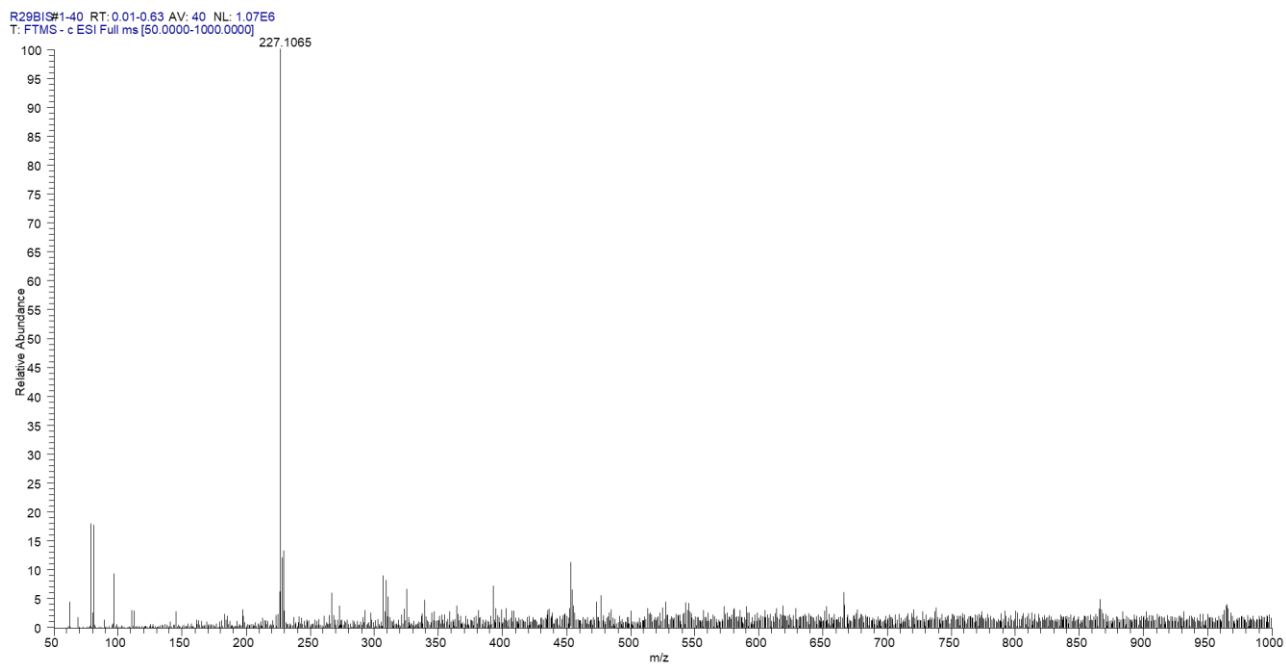

**Figure S9.** HRESIMS (-) spectrum of **12b**.

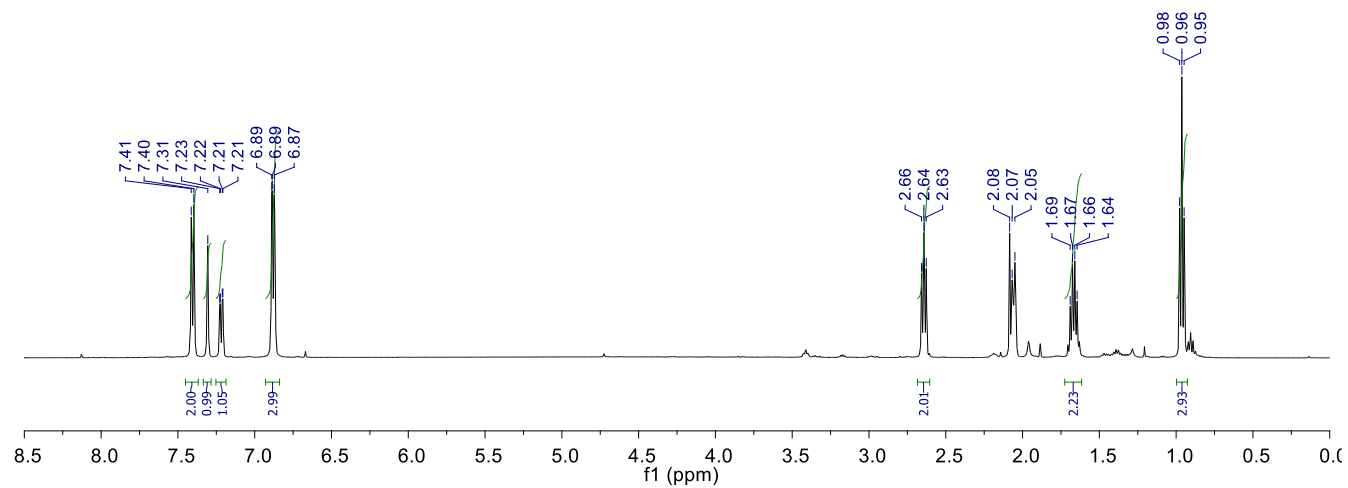

**Figure S10.**  $^1\text{H}$  NMR spectrum (500 MHz,  $(\text{CD}_3)_2\text{CO}$ ) of **12b**.



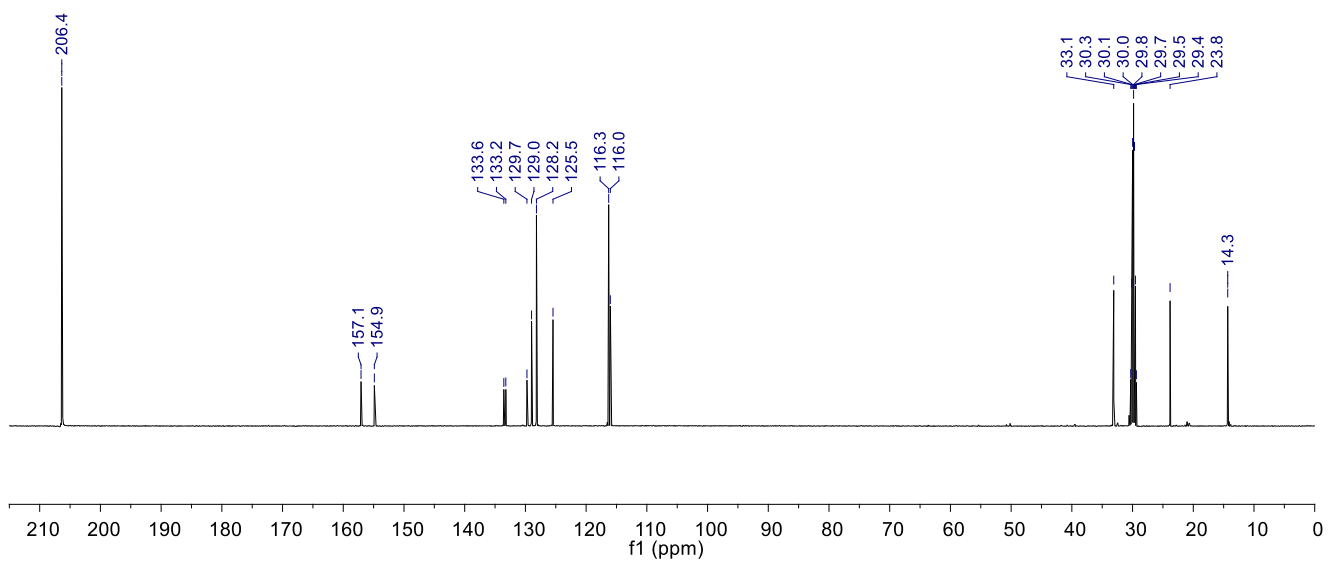

**Figure S11.** <sup>13</sup>C NMR spectrum (125 MHz, (CD<sub>3</sub>)<sub>2</sub>CO) of **12b**.

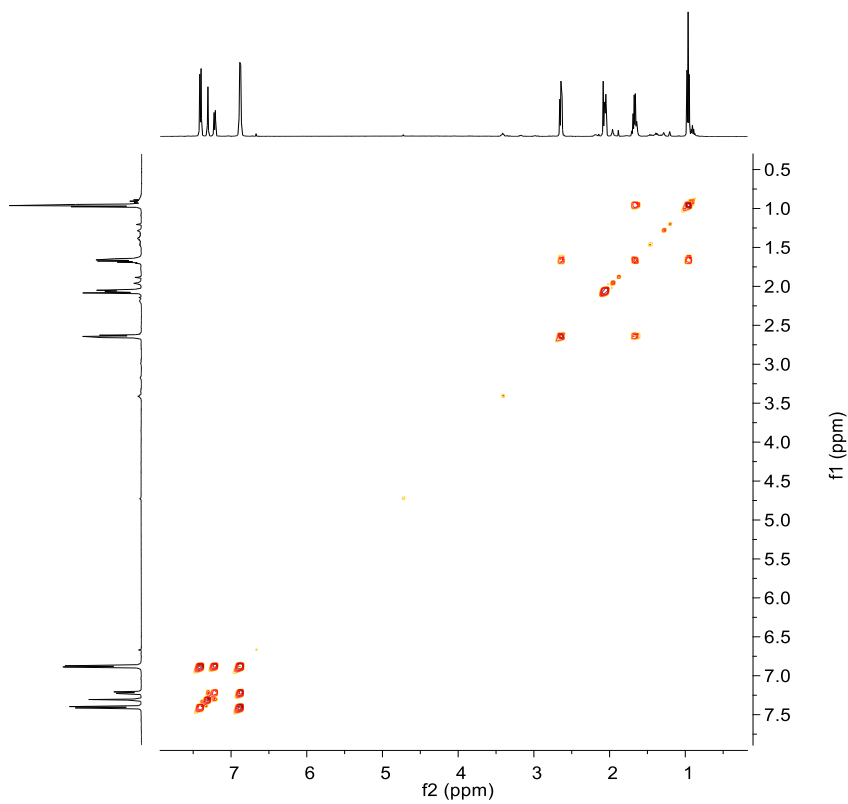

**FigureS12.** gCOSY spectrum of **12b**.

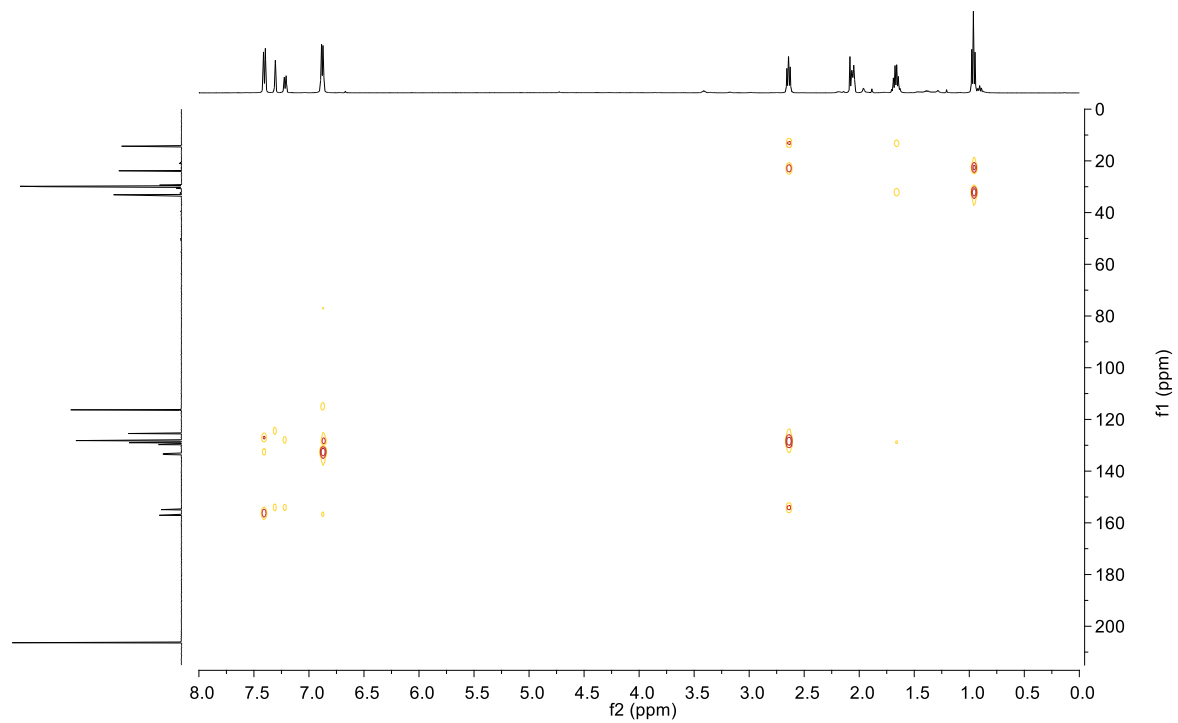

FigureS13. gHMBC spectrum of **12b**.

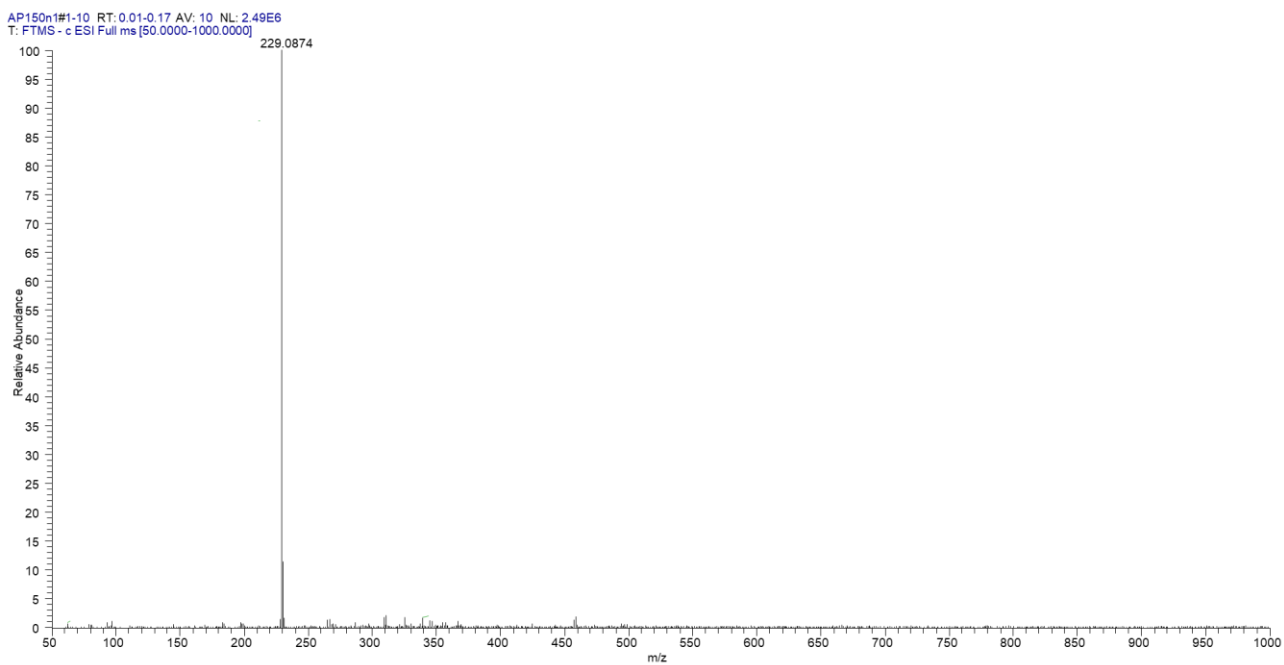

FigureS14. HRESIMS (-) spectrum of **12c**.

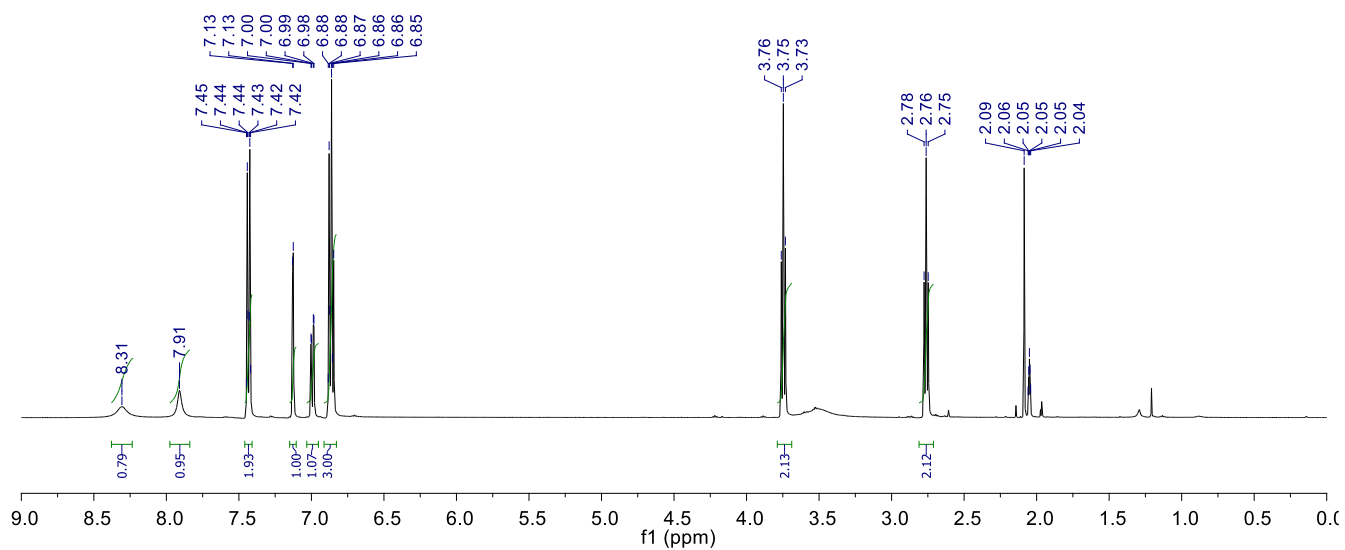

**Figure S15.**  $^1\text{H}$  NMR spectrum (500 MHz,  $(\text{CD}_3)_2\text{CO}$ ) of **12c**.

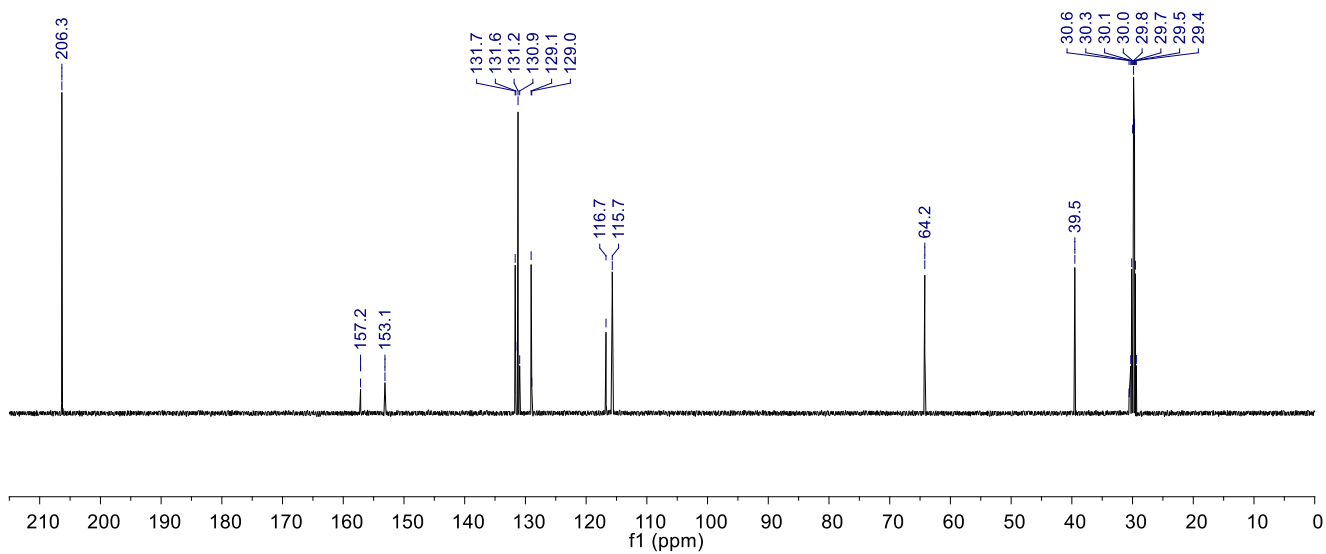

**Figure S16.**  $^{13}\text{C}$  NMR spectrum (125 MHz,  $(\text{CD}_3)_2\text{CO}$ ) of **12c**.

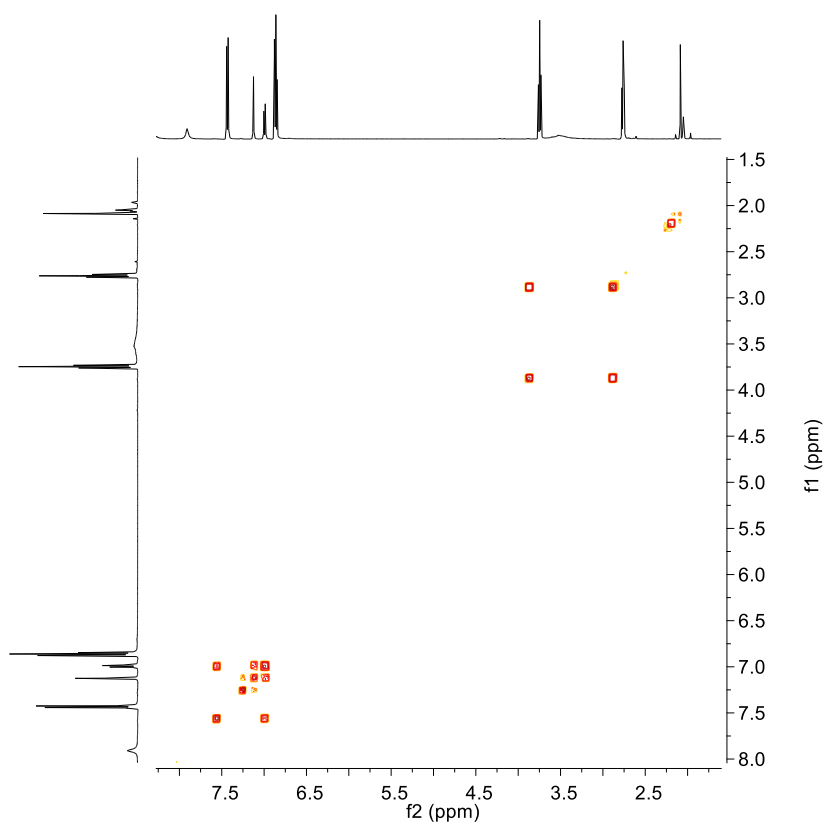

Figure S17. gCOSY spectrum of 12c.

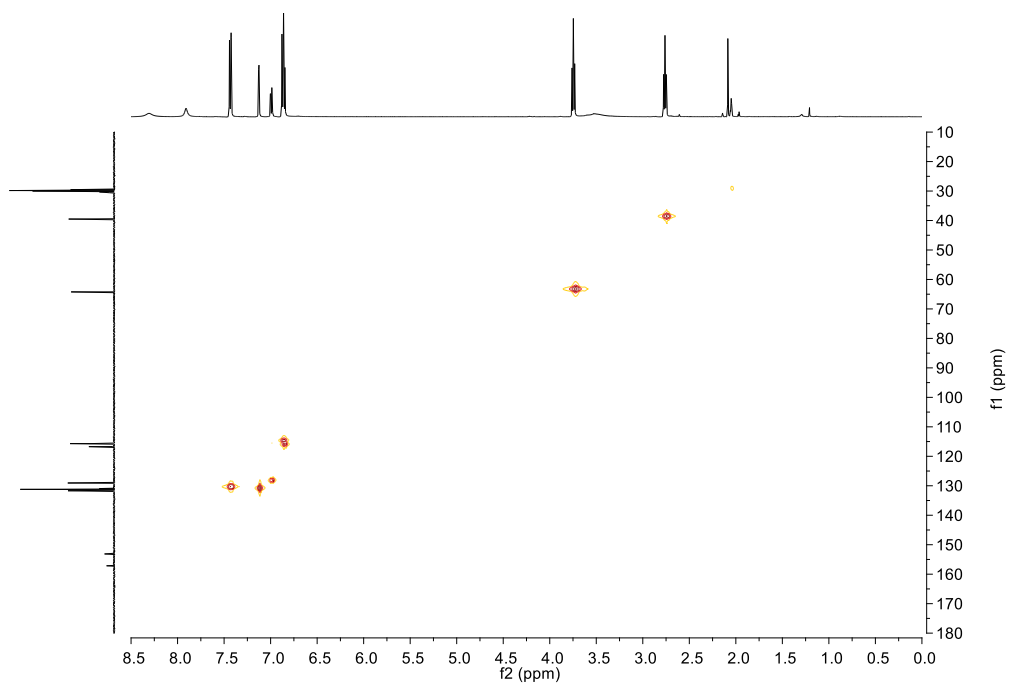

Figure S18. gHSQC spectrum of 12c.

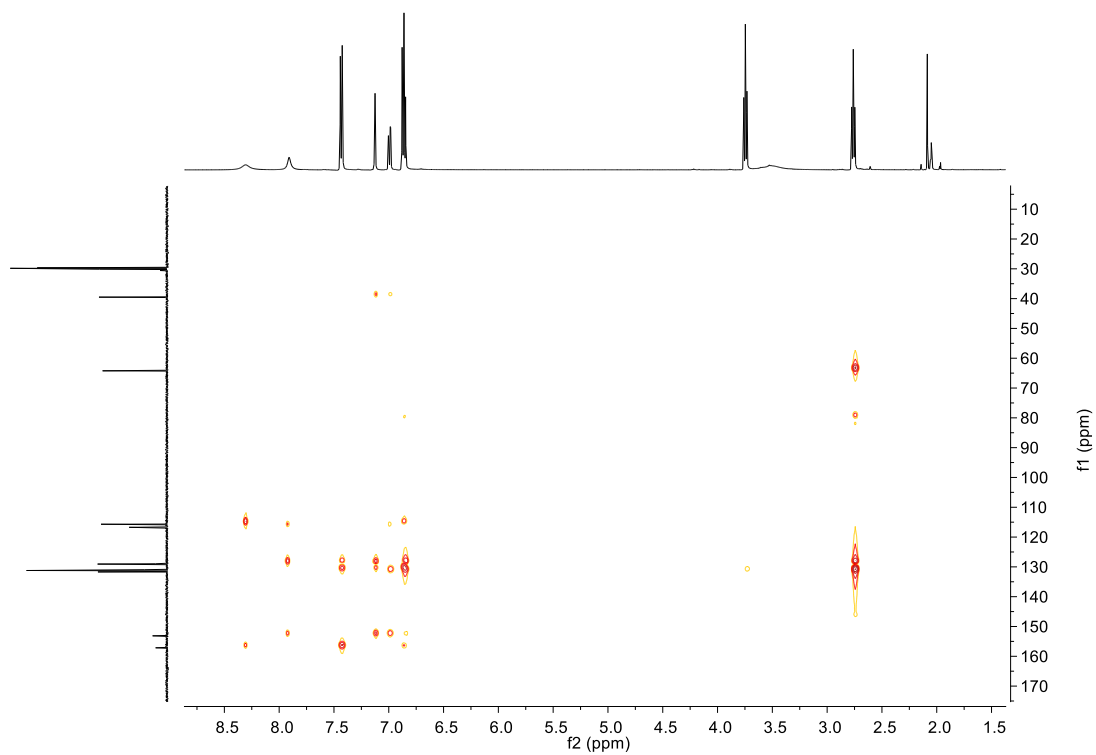

Figure S19. gHMBC spectrum of 12c.

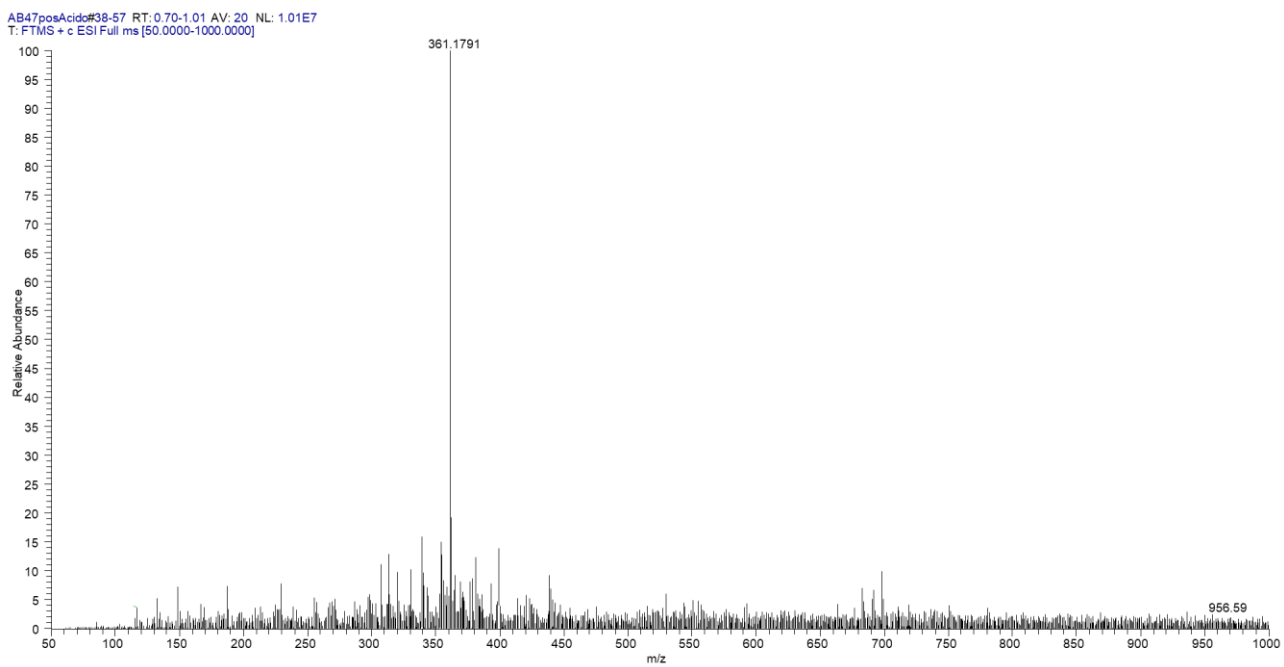

Figure S20. HRESIMS (+) spectrum of 13a.

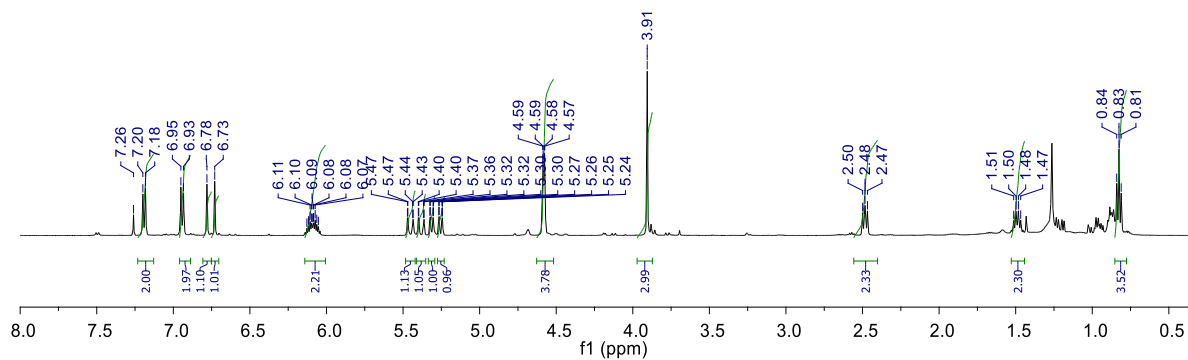

**Figure S21.**  $^1\text{H}$  NMR spectrum (500 MHz,  $\text{CDCl}_3$ ) of **13a**.

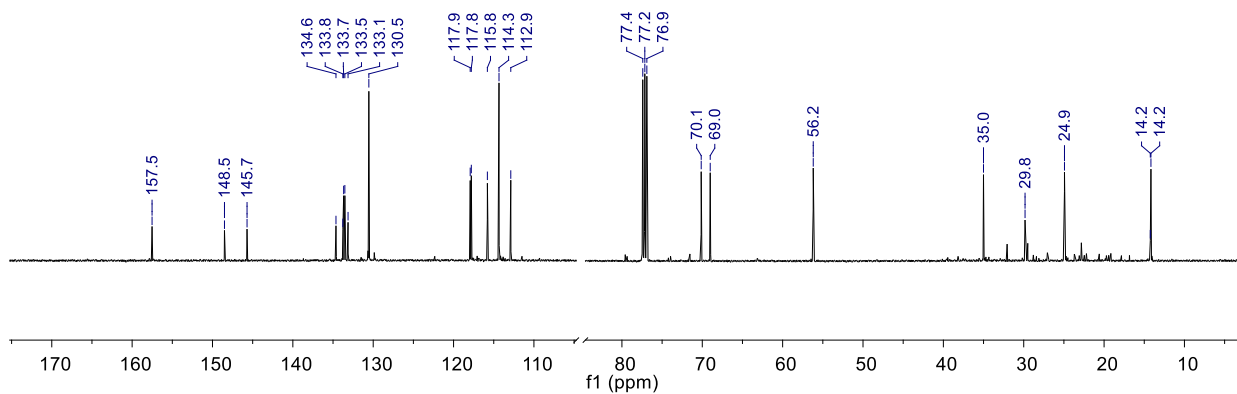

**Figure S22.**  $^{13}\text{C}$  NMR spectrum (125 MHz,  $\text{CDCl}_3$ ) of **13a**.

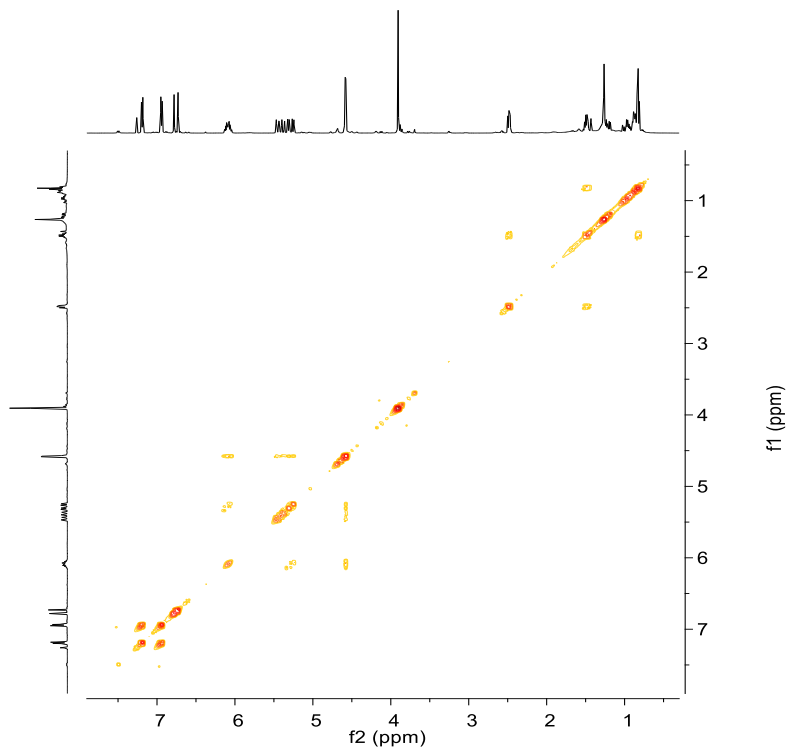

Figure S23. gCOSY spectrum of 13a.

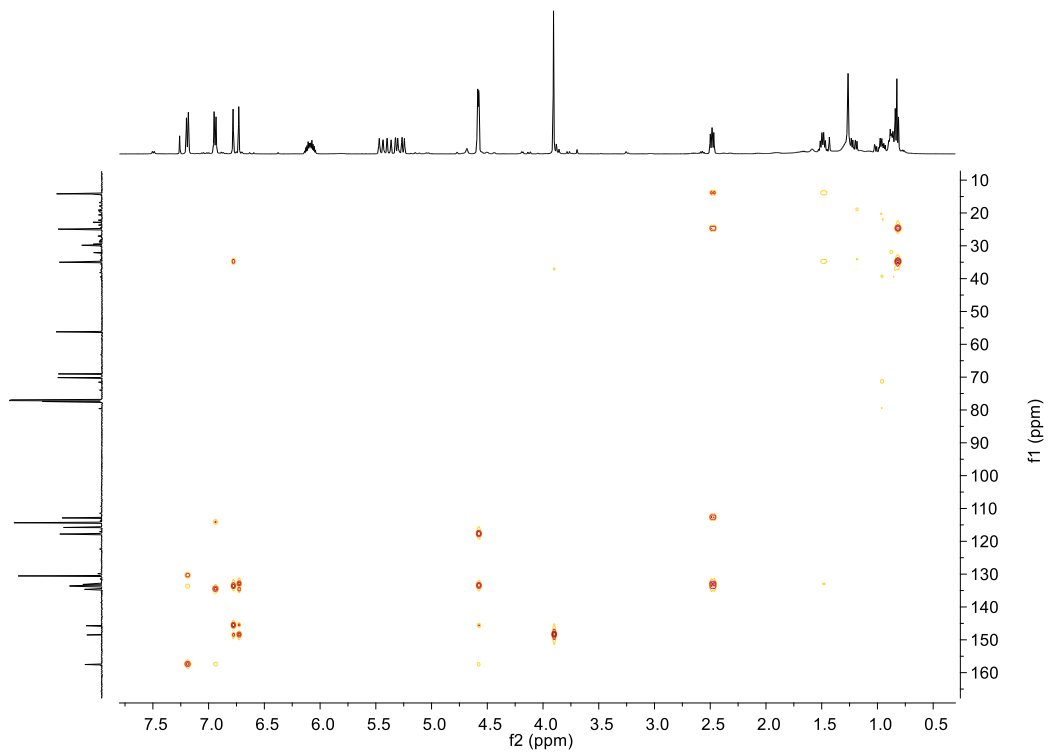

Figure S24 gHMBC spectrum of 13a.

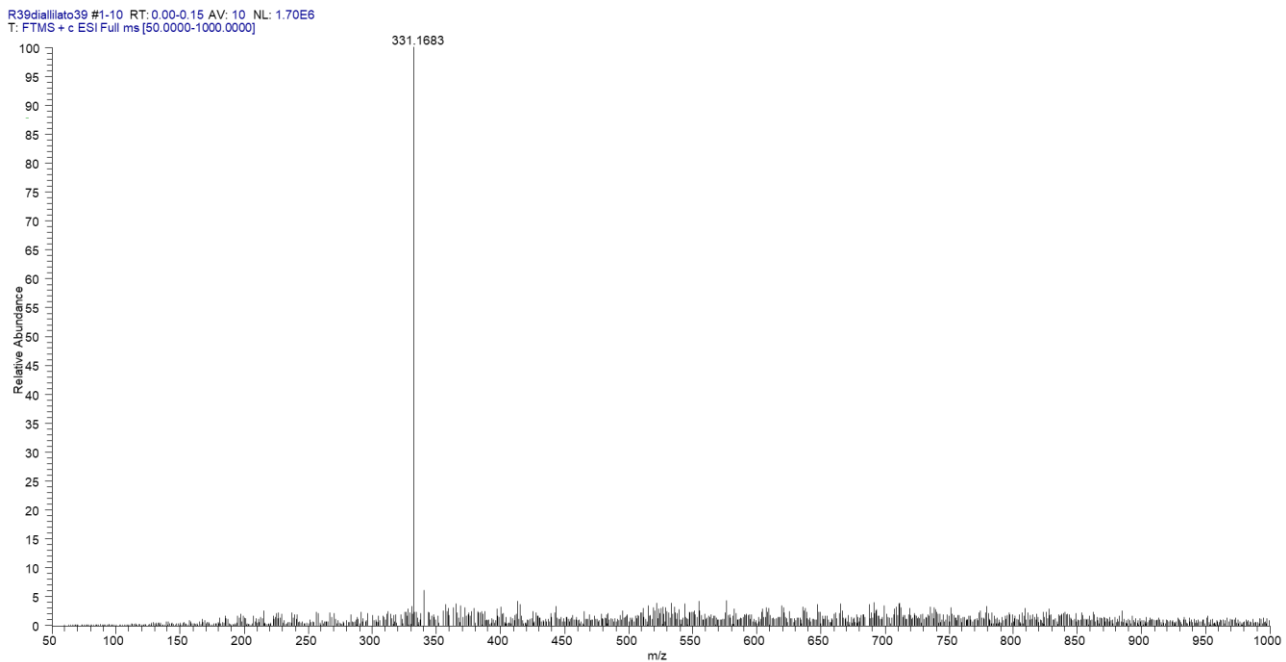

Figure S25 HRESIMS (+) spectrum of **13b**.

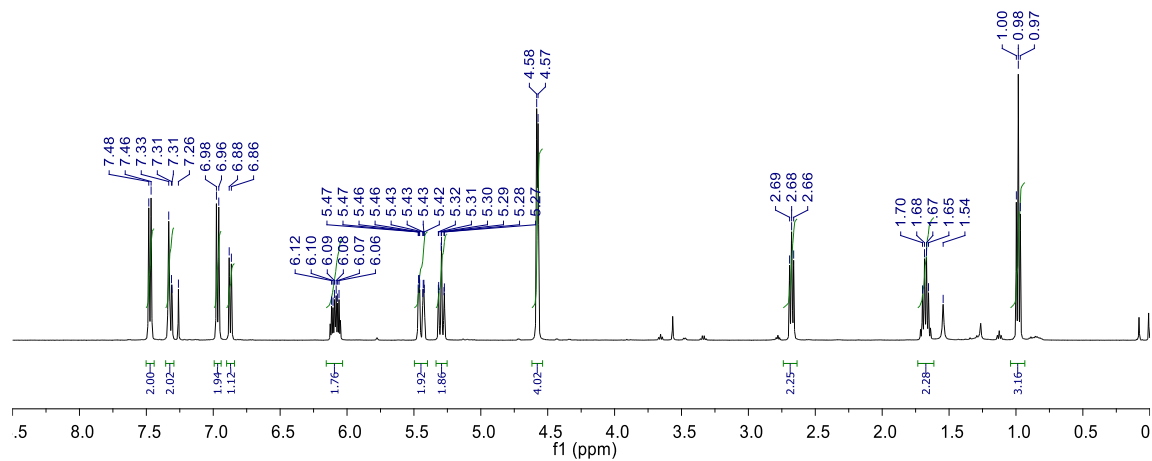

Figure S26.  $^1\text{H}$  NMR spectrum (500 MHz,  $\text{CDCl}_3$ ) of **13b**.



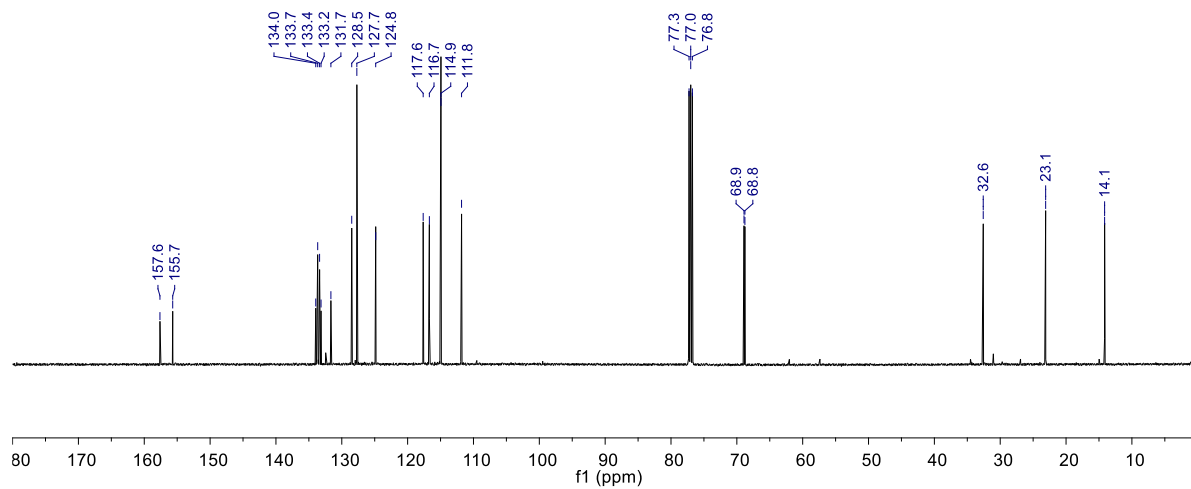

Figure S27.  $^{13}\text{C}$  NMR spectrum (125MHz,  $\text{CDCl}_3$ ) of **13b**.

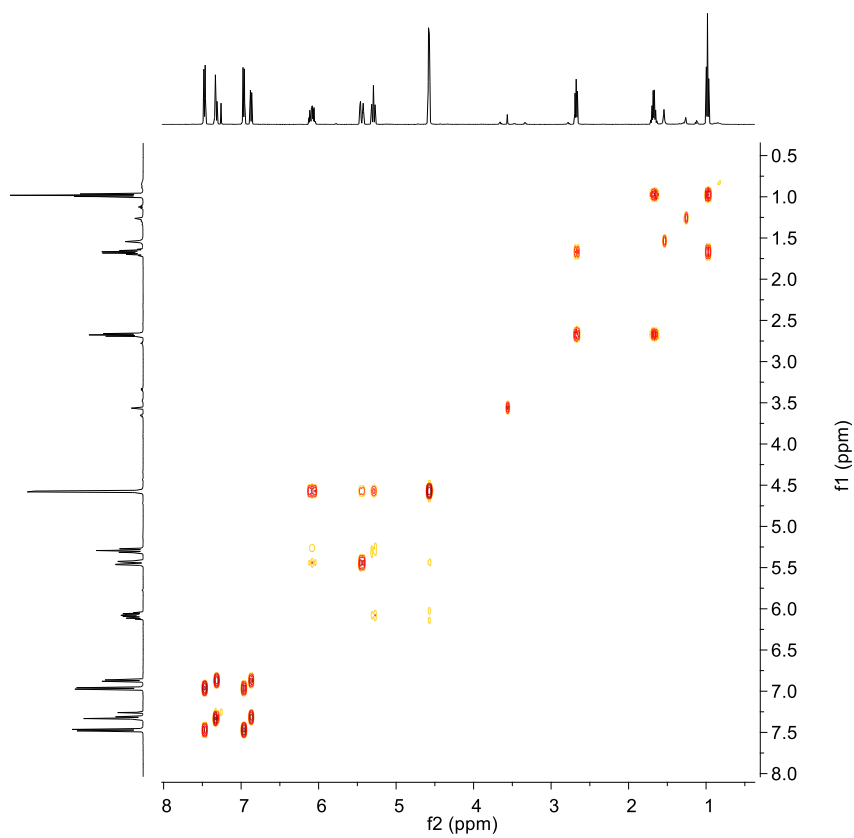

Figure S28. gCOSY spectrum of **13b**.

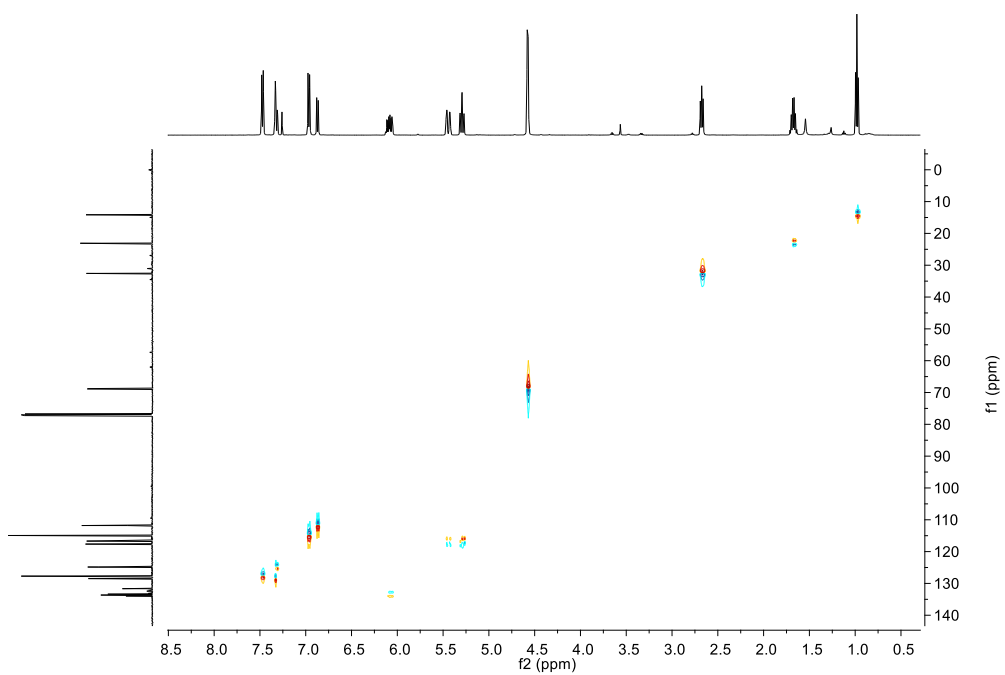

Figure S29. gHSQC spectrum of **13b**.

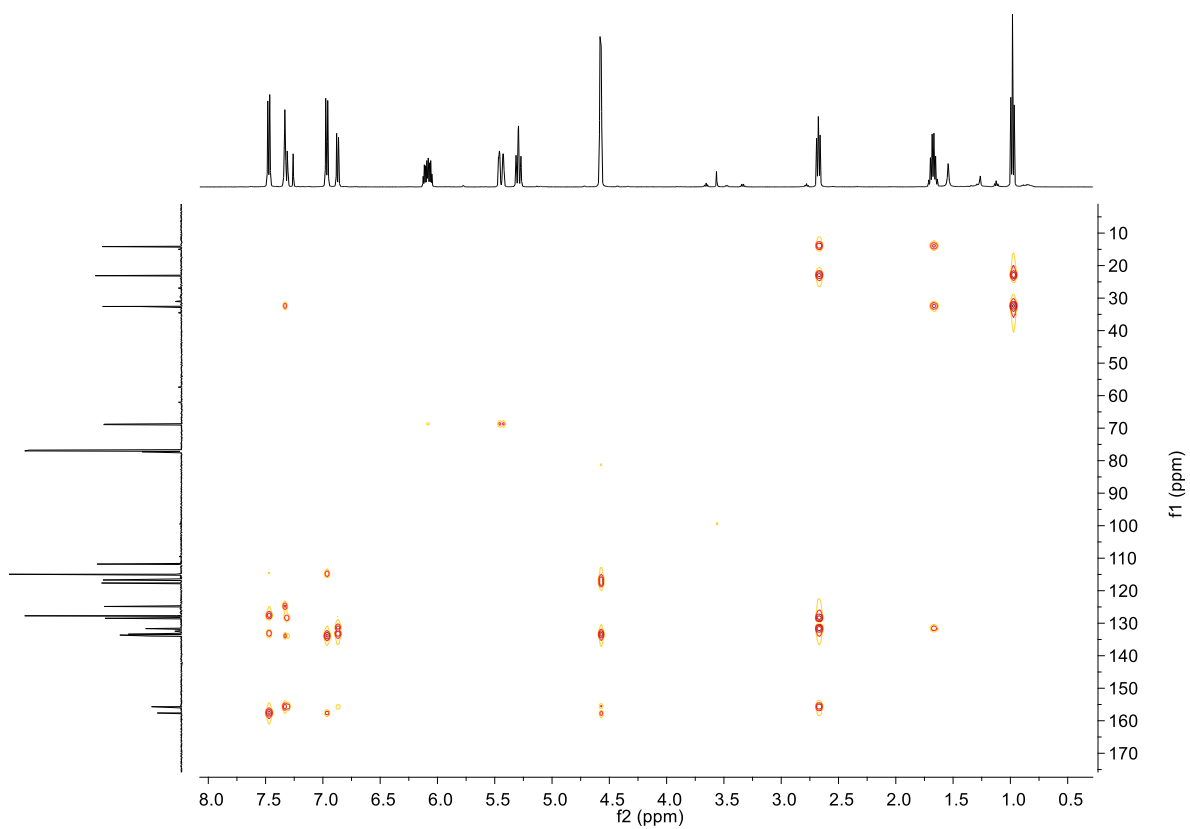

Figure S30. gHMBC spectrum of **13b**.

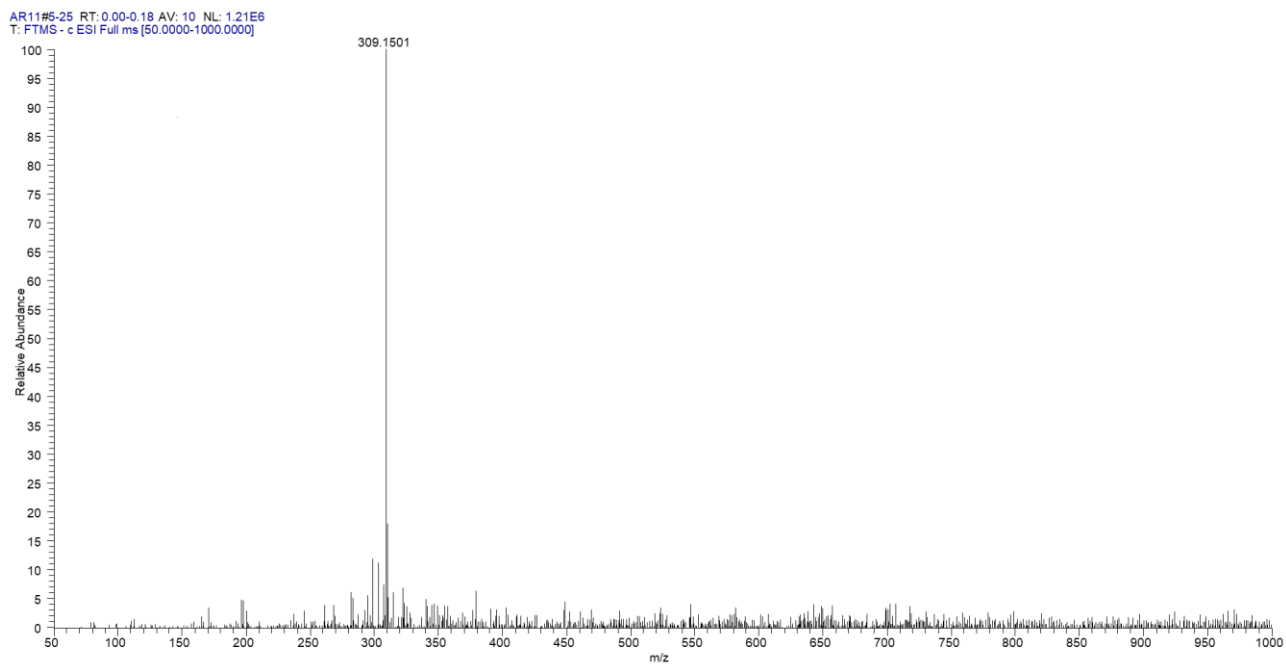

Figure S31. HRESIMS (-) spectrum of **13c**.

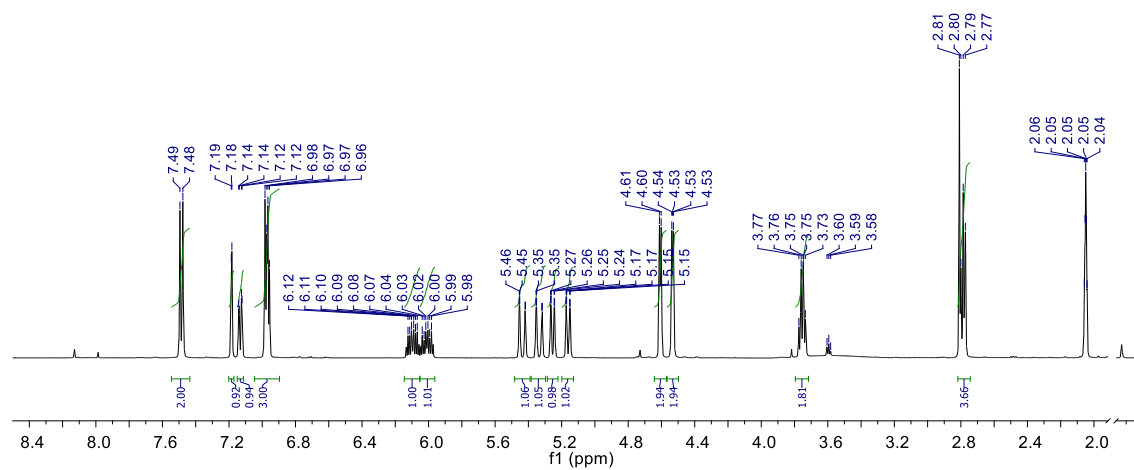

Figure S32.  $^1\text{H}$  NMR spectrum (500 MHz,  $(\text{CD}_3)_2\text{CO}$ ) of **13c**.

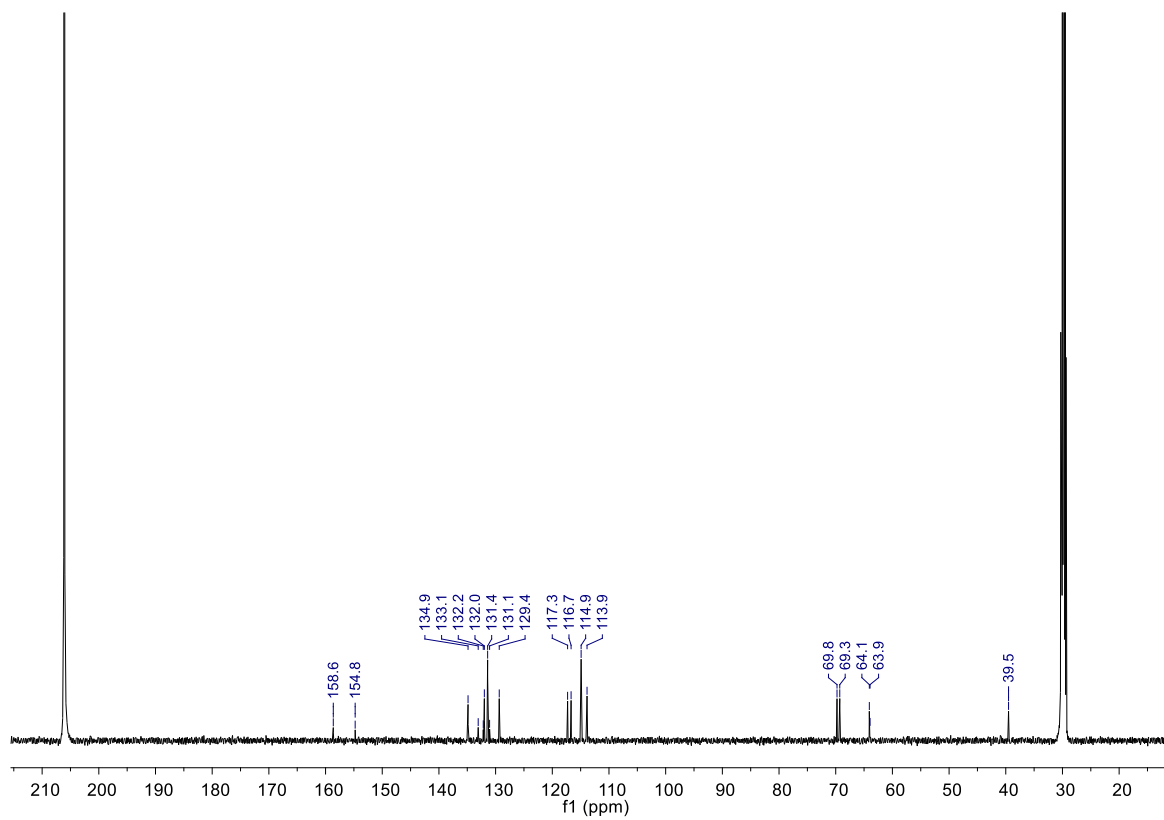

**Figure S33.**  $^{13}\text{C}$  NMR spectrum (125 MHz,  $(\text{CD}_3)_2\text{CO}$ ) of **13c**.

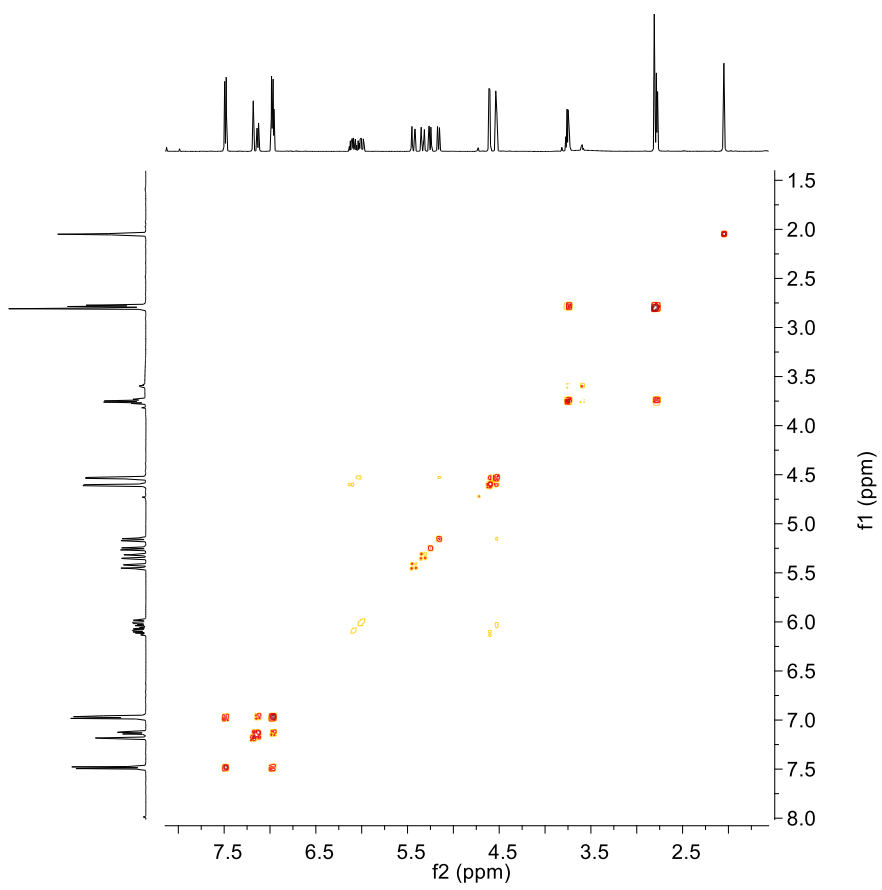

**Figure S34.** gCOSY spectrum of **13c**.

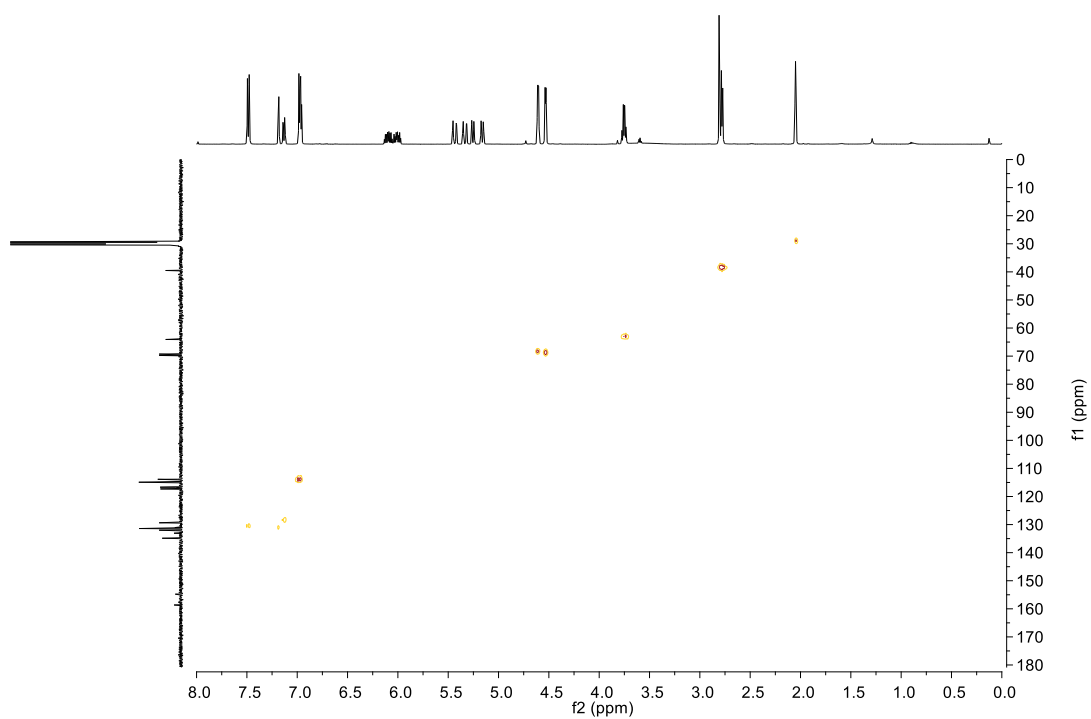

Figure S35. gHSQC spectrum of 13c.

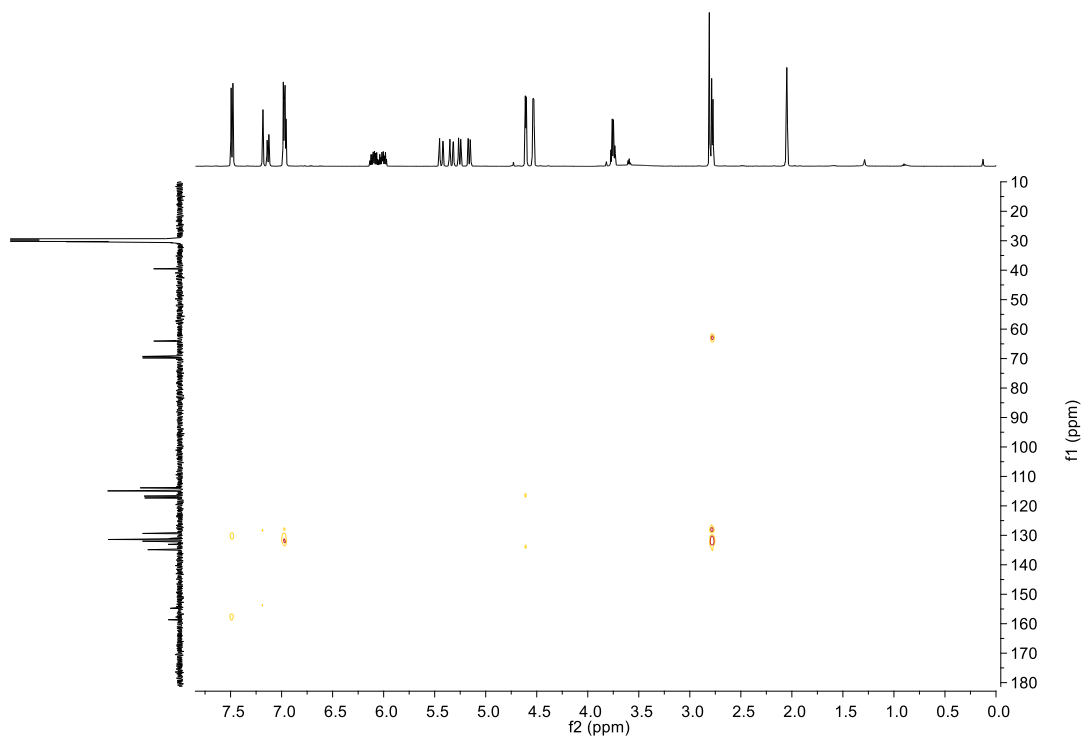

Figure S36. gHMBC spectrum of 13c.

AH-19 #1-55 RT: 0.01-0.79 AV: 40 NL: 1.02E6  
T: FTMS - c ESI Full ms [50.0000-1000.0000]

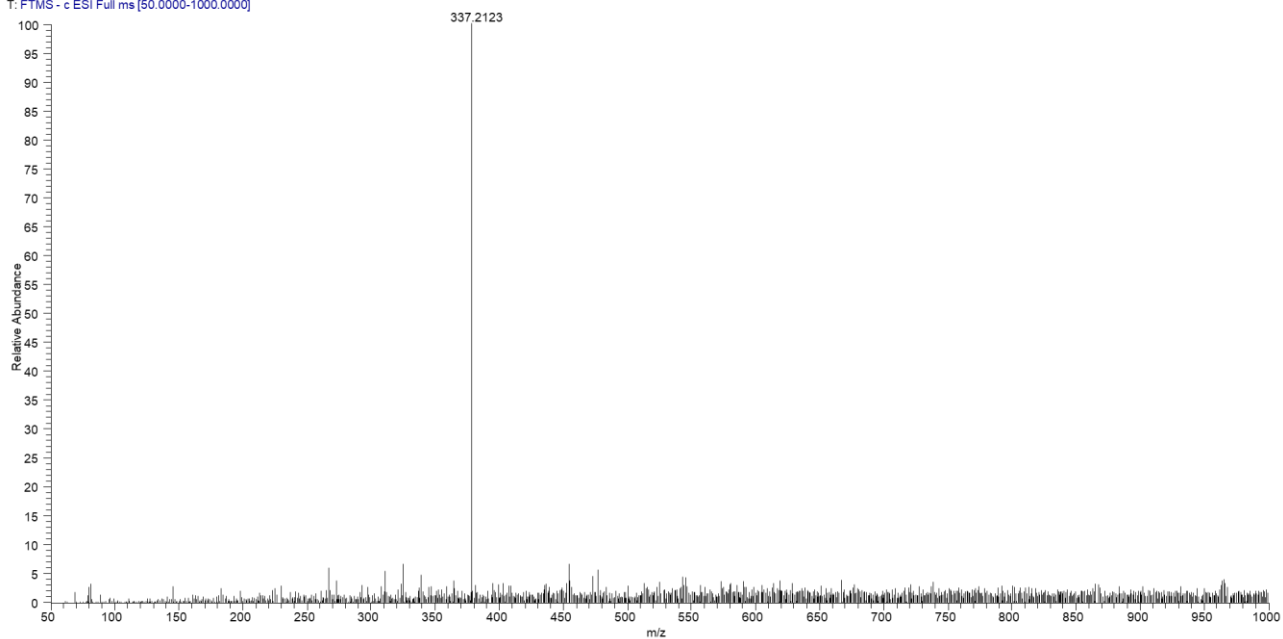

Figure S37. HRESIMS (-) spectrum of 14a.

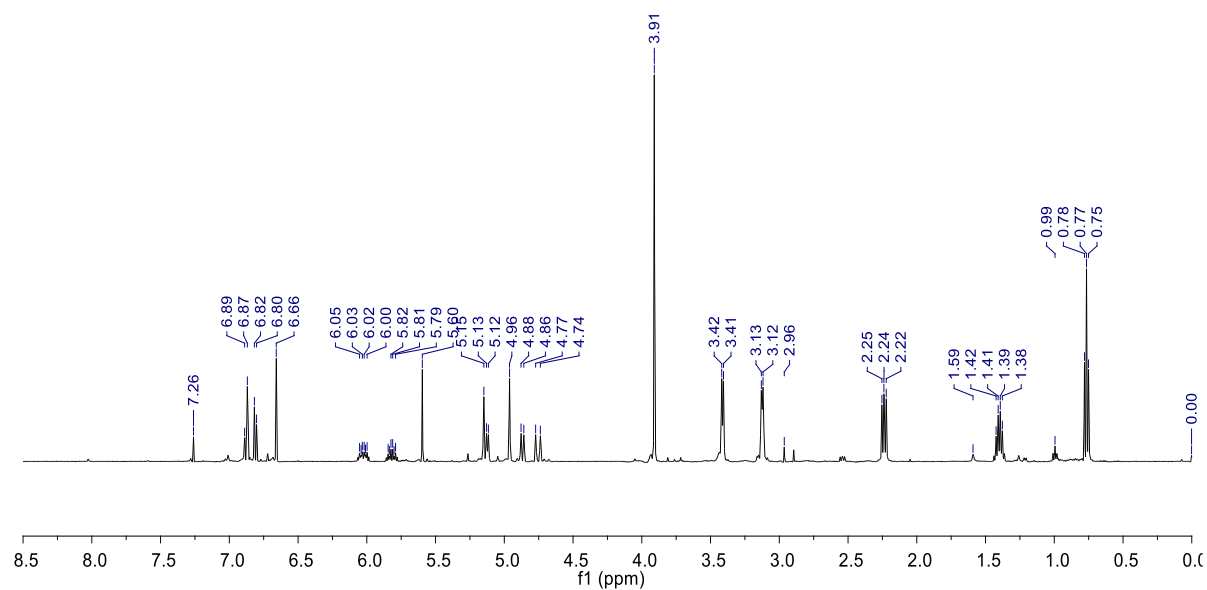

Figure S38. <sup>1</sup>H NMR spectrum (500 MHz, CDCl<sub>3</sub>) of 14a.

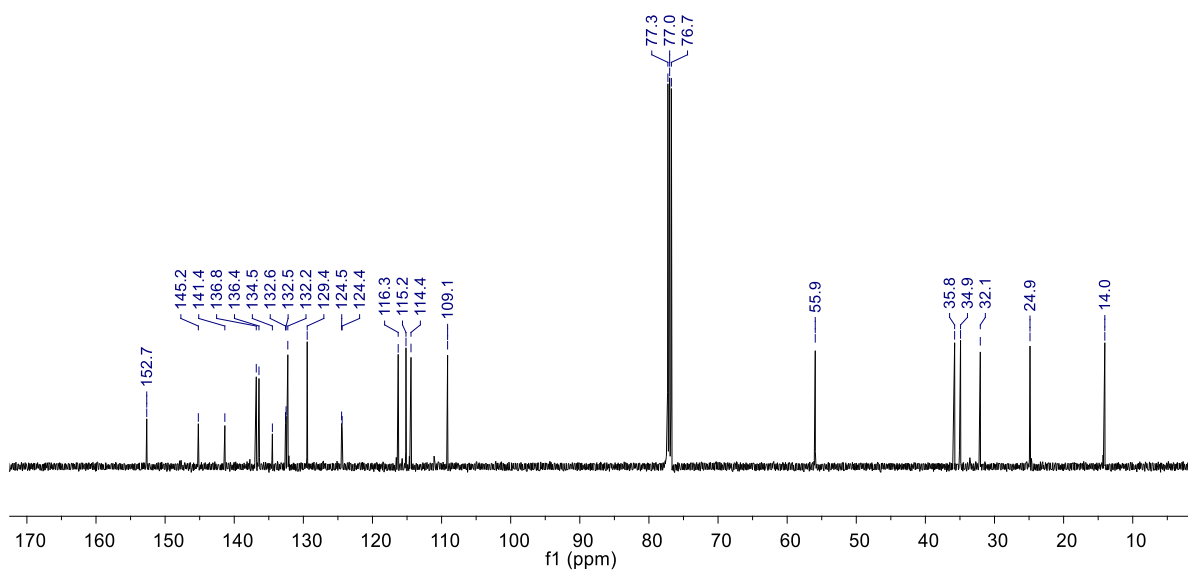

Figure S39. <sup>13</sup>C NMR spectrum (125 MHz, CDCl<sub>3</sub>) of 14a.

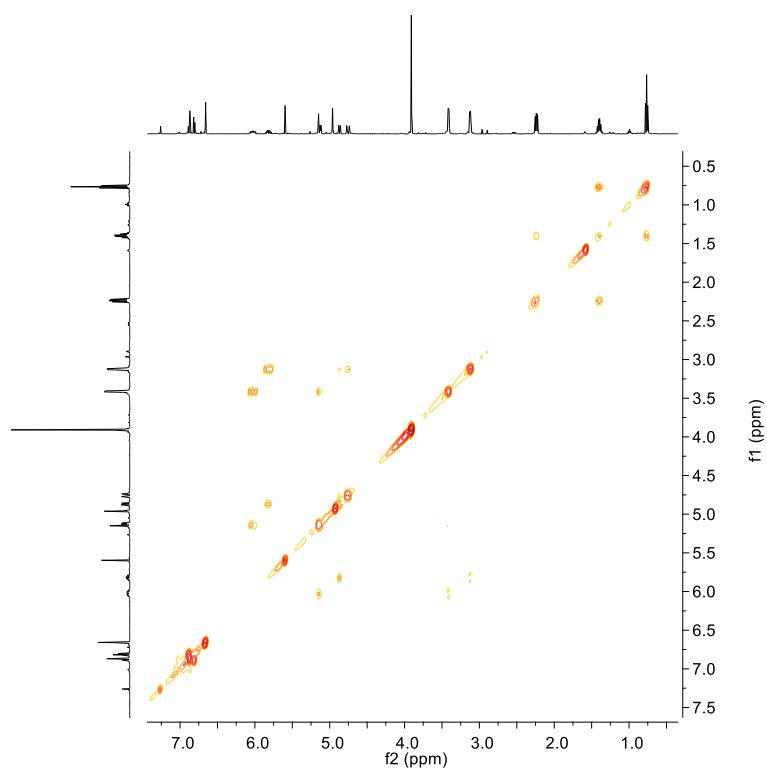

Figure S40. gCOSY spectrum of 14a.



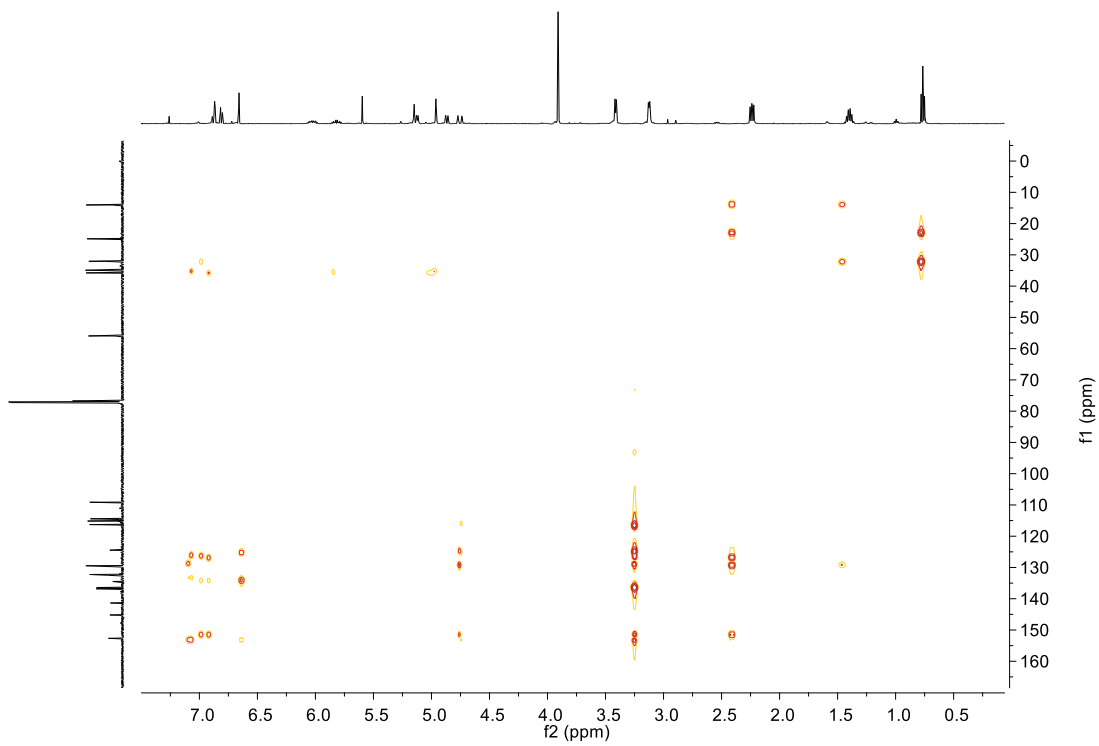

Figure S41. gHMBC spectrum of 14a.

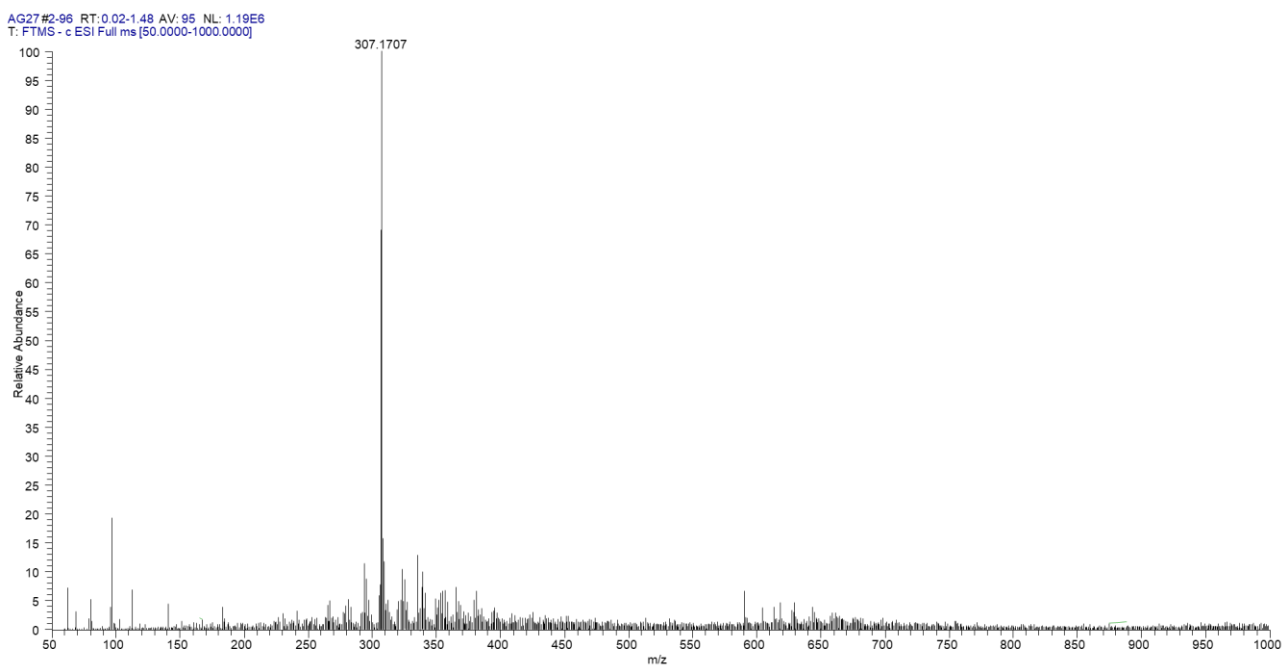

Figure S42. HRESIMS (-) spectrum of 14b.

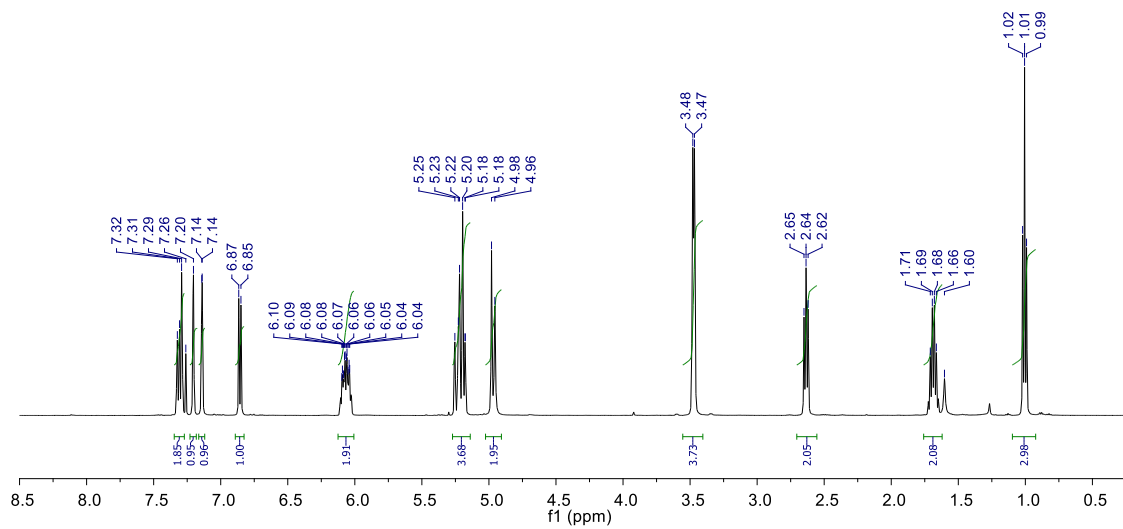

Figure S43.  $^1\text{H}$  NMR spectrum (500 MHz,  $\text{CDCl}_3$ ) of **14b**.

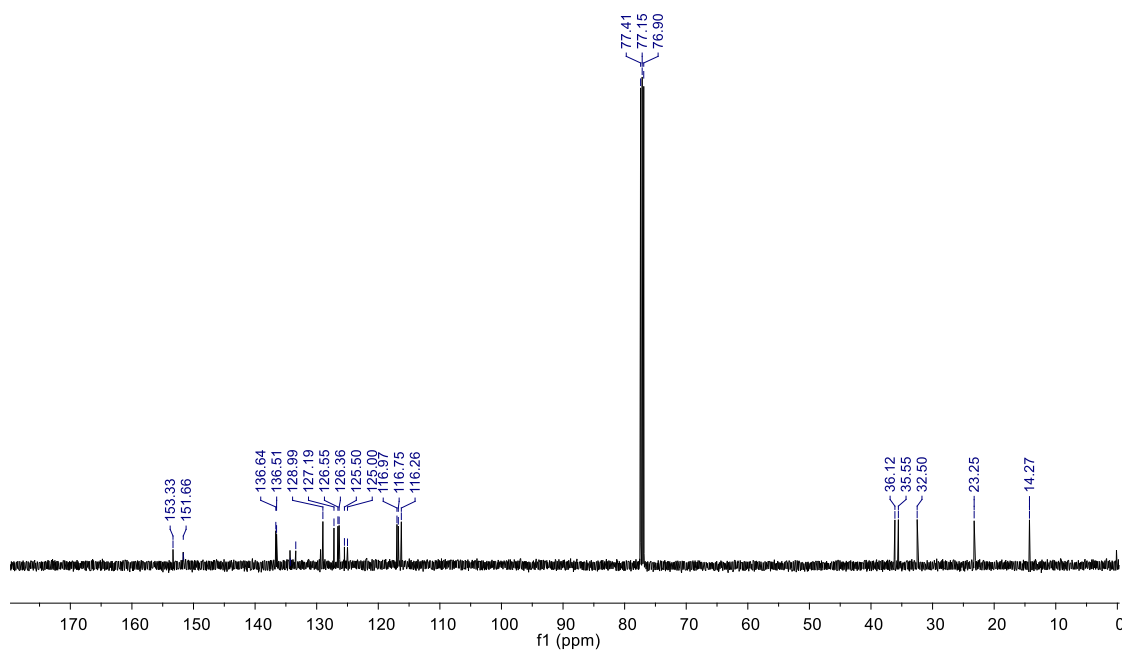

Figure S44.  $^{13}\text{C}$  NMR spectrum (125 MHz,  $\text{CDCl}_3$ ) of **14b**.

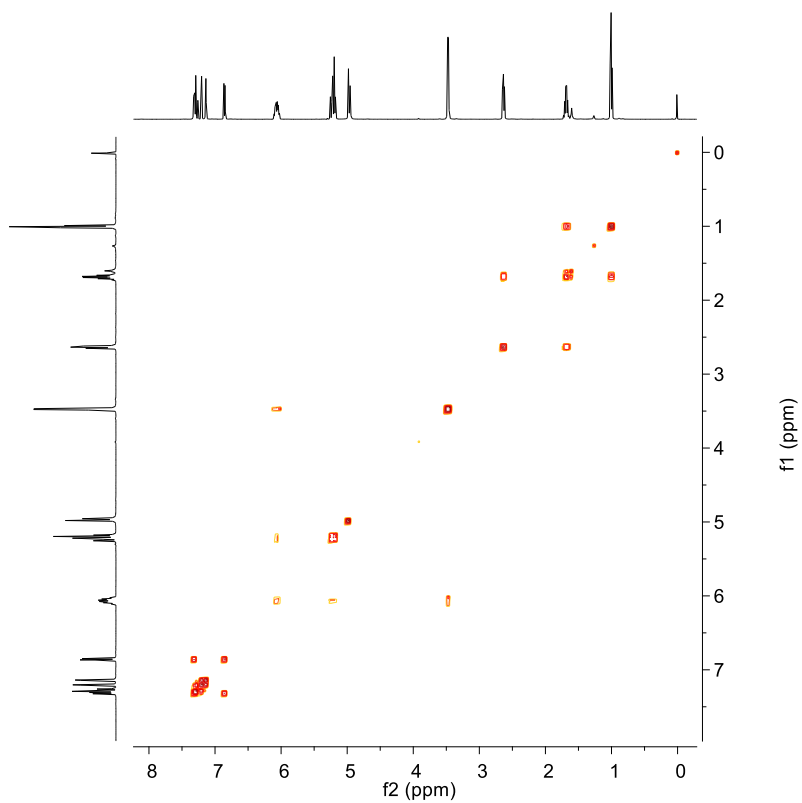

Figure S45. gCOSY spectrum of **14b**.

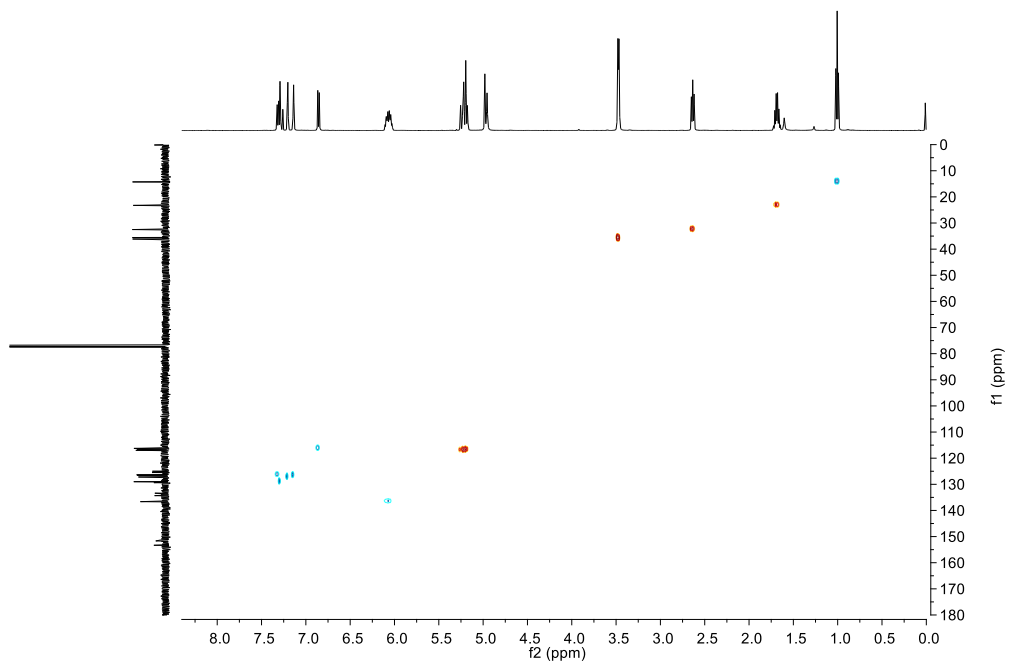

Figure S46. gHSQC spectrum of **14b**.

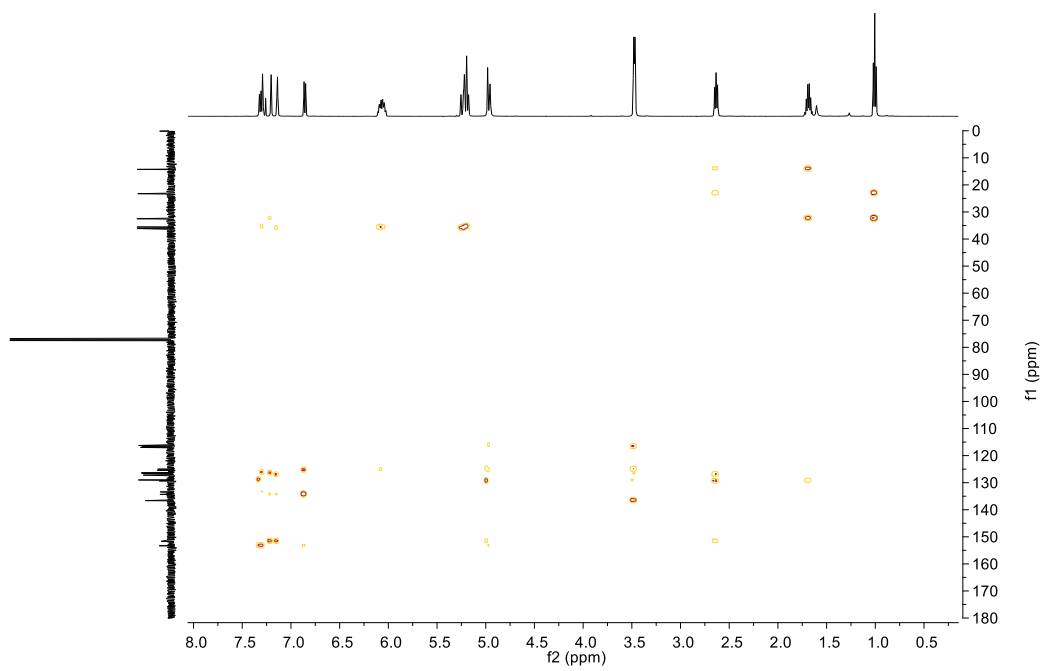

Figure S47. gHMBC spectrum of 14b.

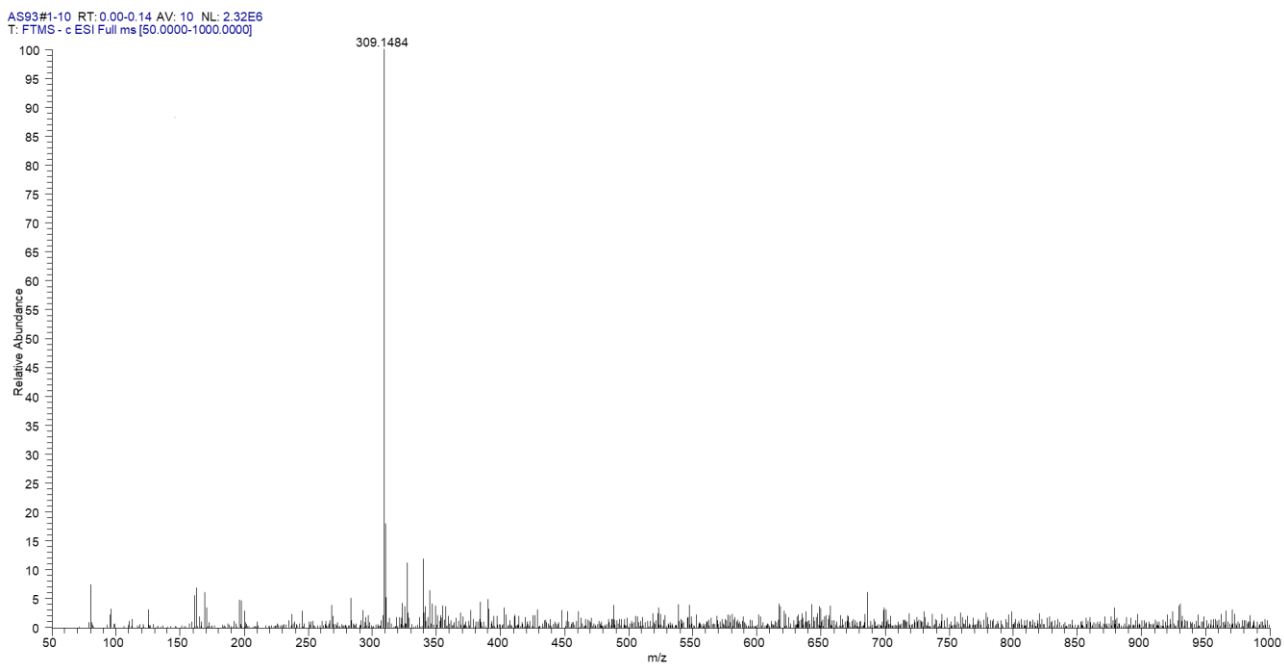

Figure S48. HRESIMS (-) spectrum of 14c.

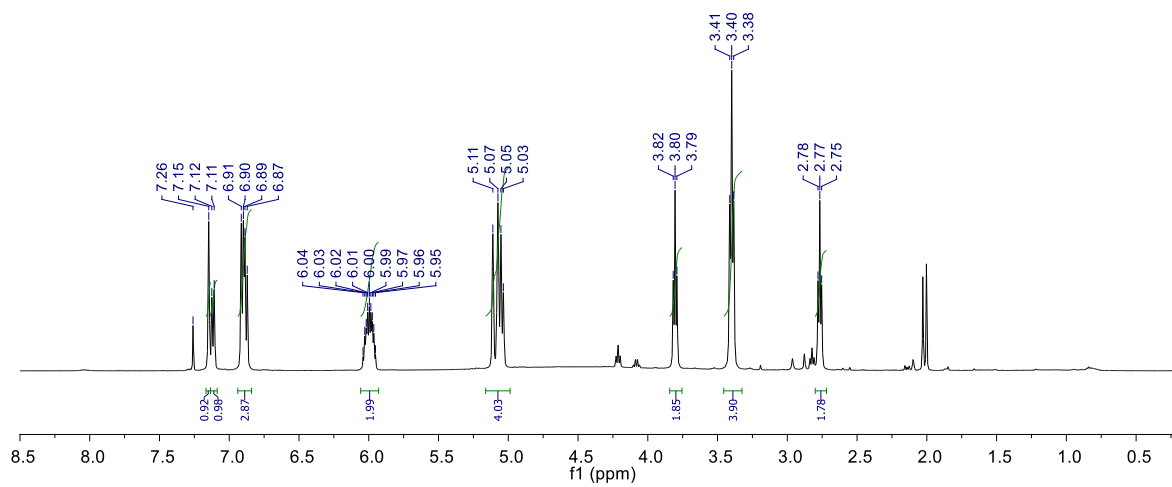

Figure S49.  $^1\text{H}$  NMR spectrum (500 MHz,  $(\text{CD}_3)_2\text{CO}$ ) of **14c**.

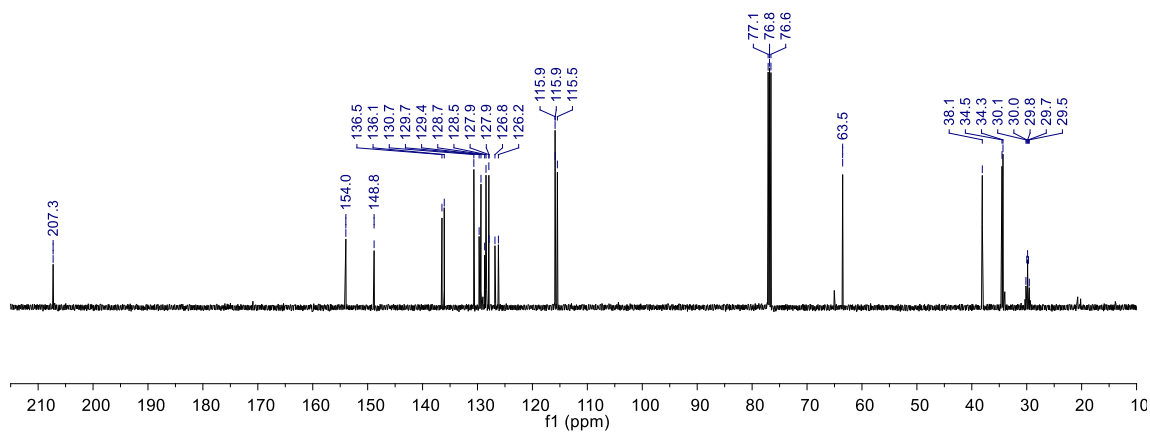

Figure S50.  $^{13}\text{C}$  NMR spectrum (125 MHz,  $(\text{CD}_3)_2\text{CO}$ ) of **14c**.

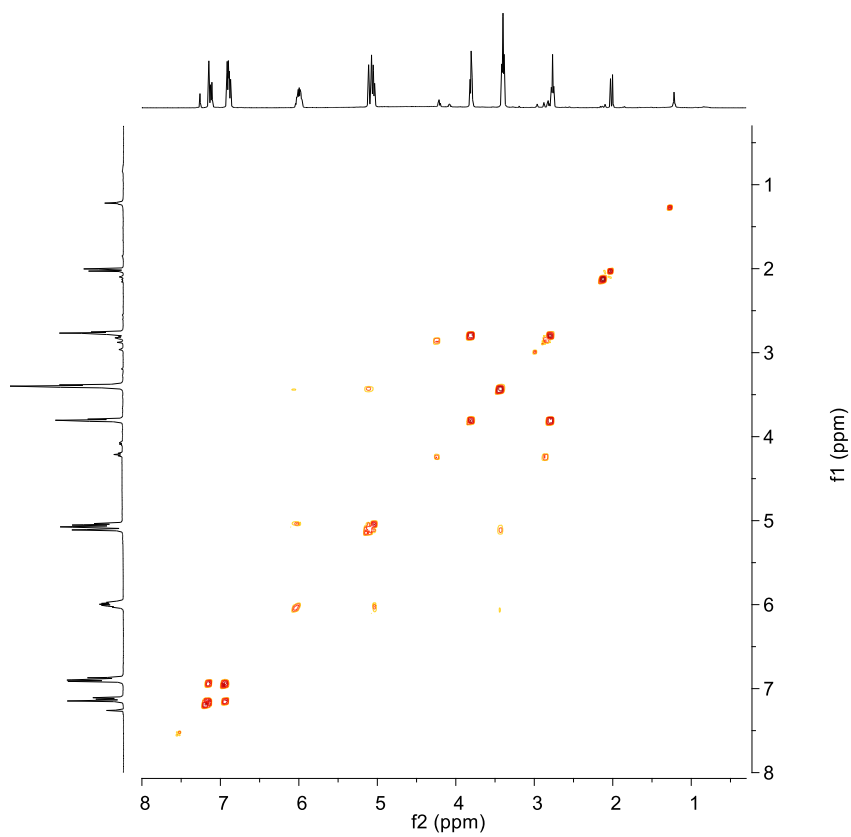

Figure S51. gCOSY spectrum of **14c**.

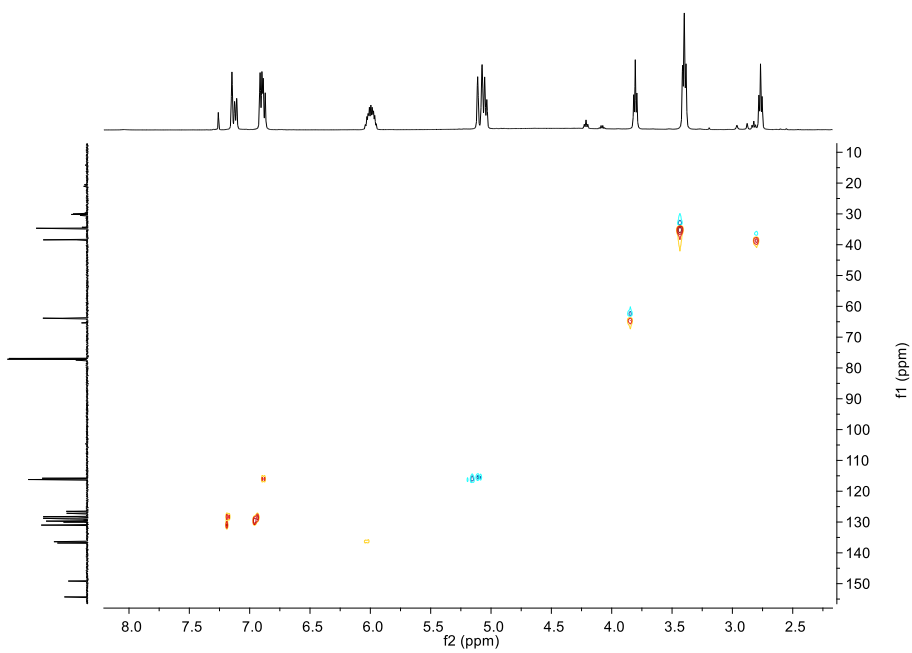

Figure S52. gHSQC spectrum of **14c**.

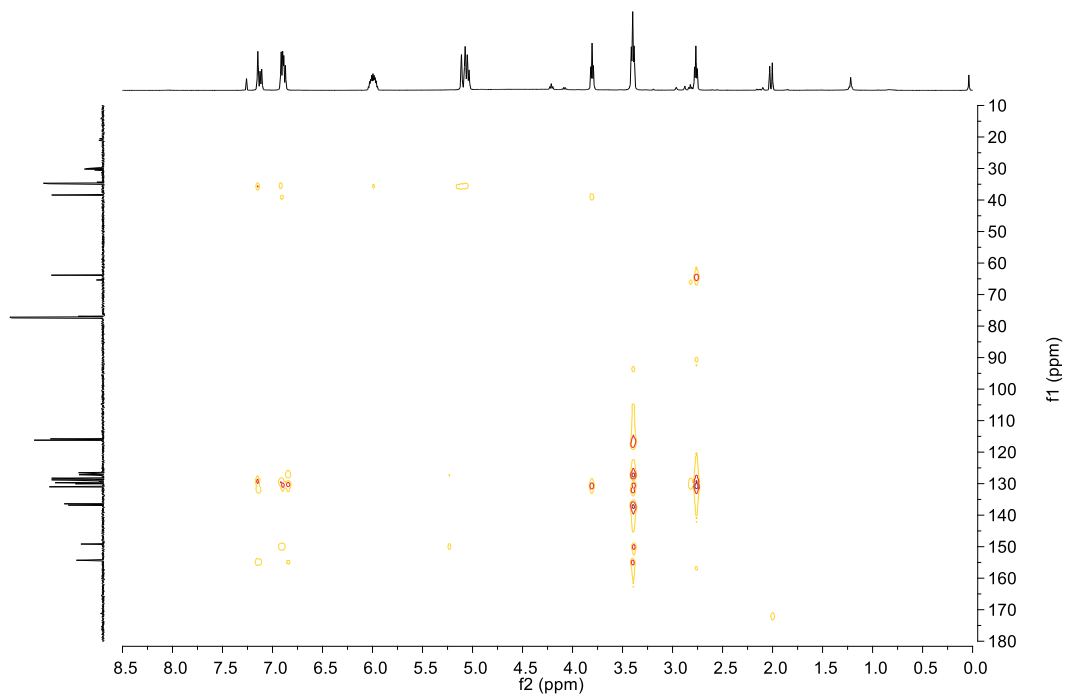

Figure S53. gHMBC spectrum of 14c.

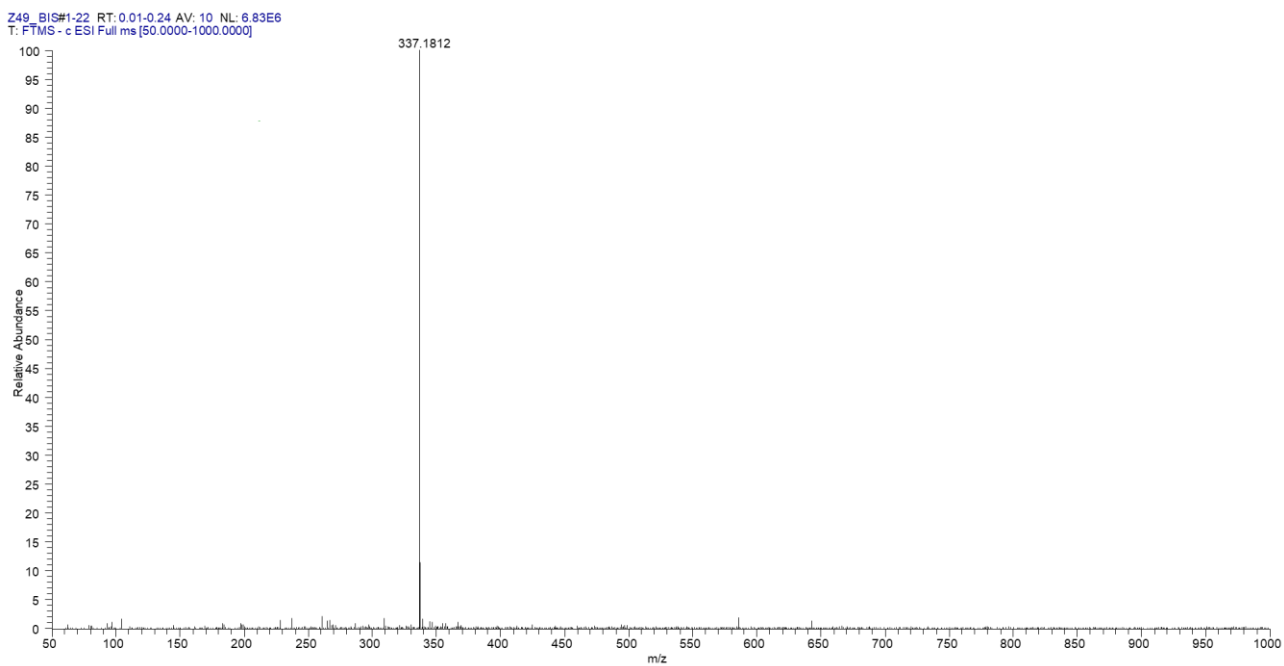

Figure S54. HRESIMS (-) spectrum of 15a.

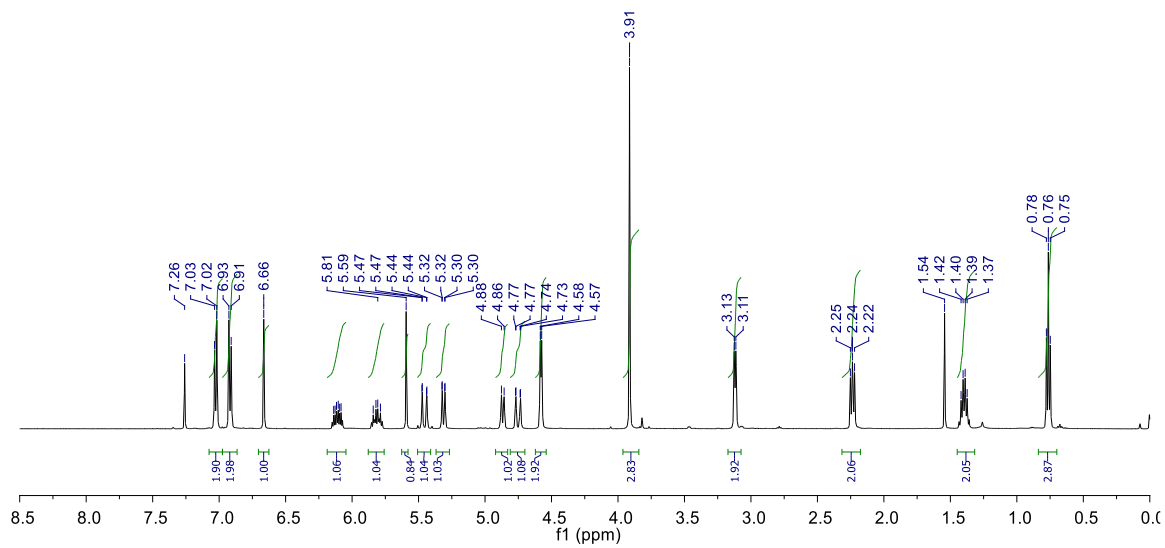

Figure S55. <sup>1</sup>H NMR spectrum (500 MHz, CDCl<sub>3</sub>) of 15a.

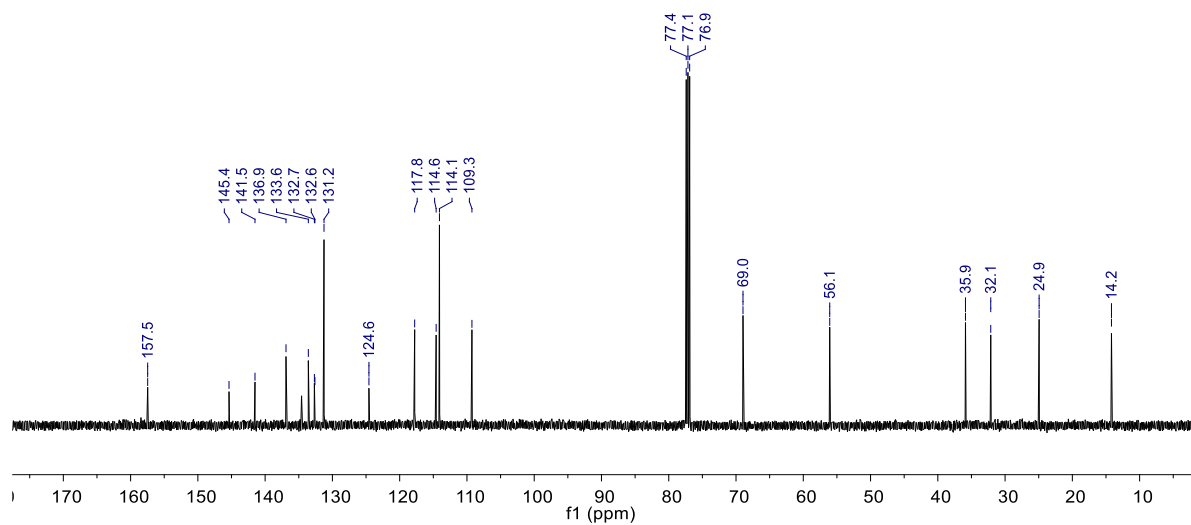

Figure S56. <sup>13</sup>C NMR spectrum (125 MHz, CDCl<sub>3</sub>) of 15a.



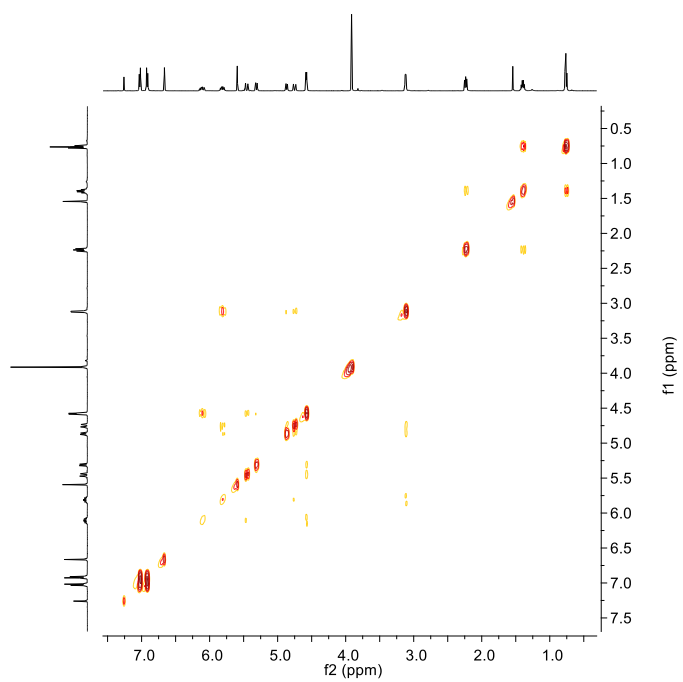

Figure S57. gCOSY spectrum of **15a**.

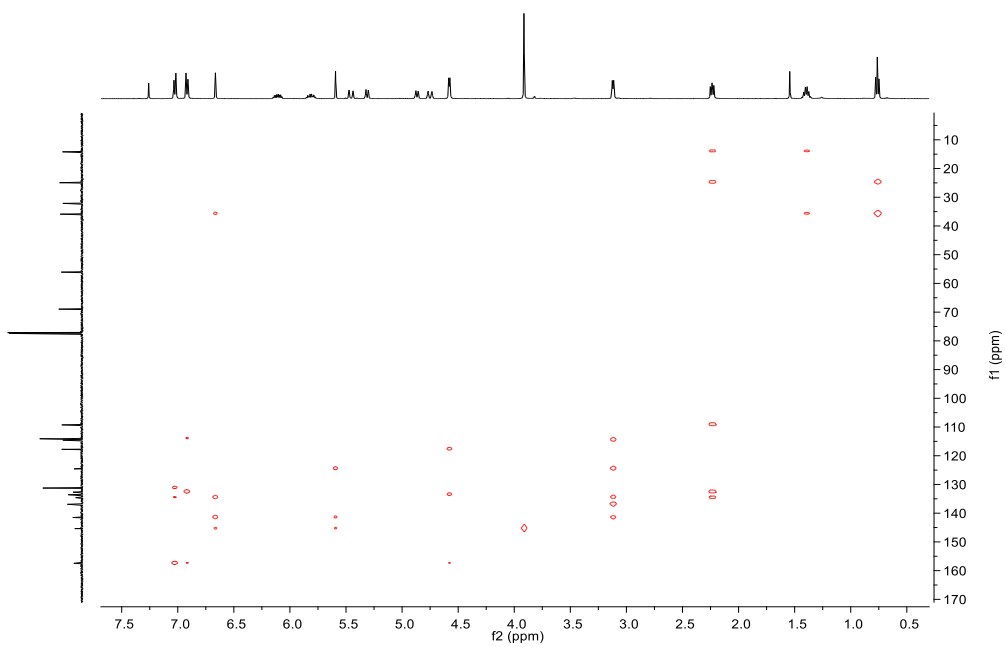

Figure S58. gHMBC spectrum of **15a**.
